# Supplementary material
Source: publisher figshare collection journal article supplement (https://geolsoc.figshare.com/articles/dataset/_/3454712)

Combined Probability density plot

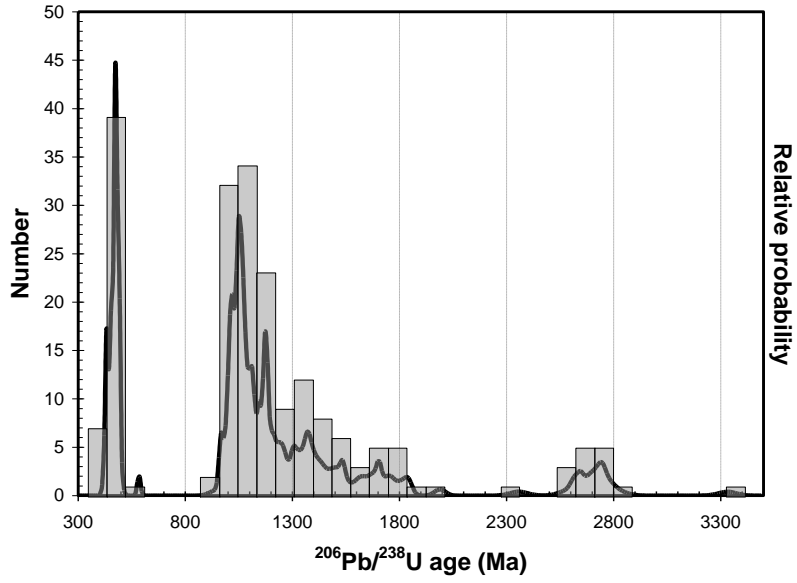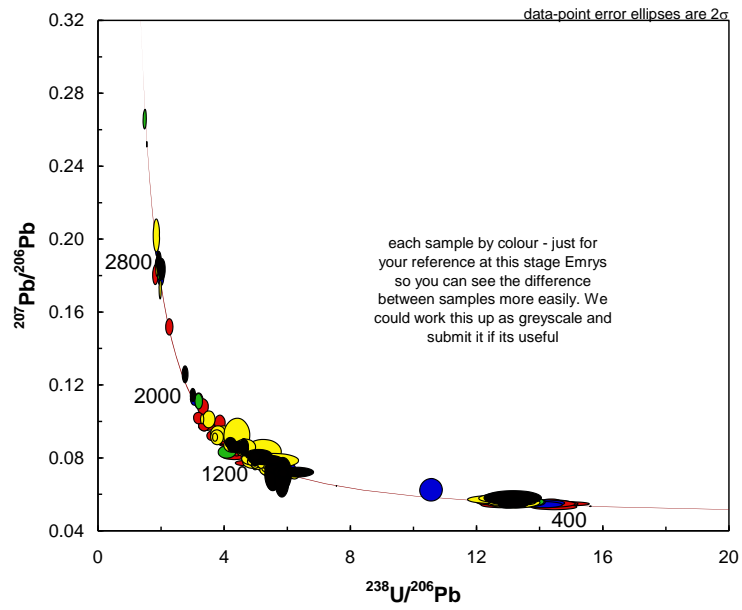

Probability density plot for sample N5065

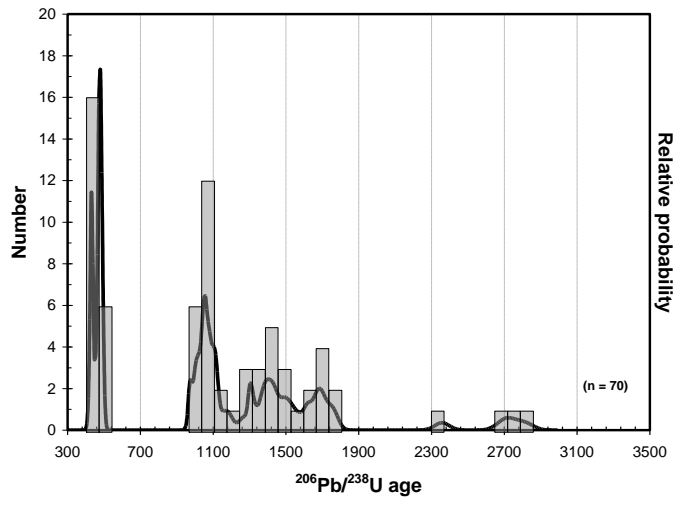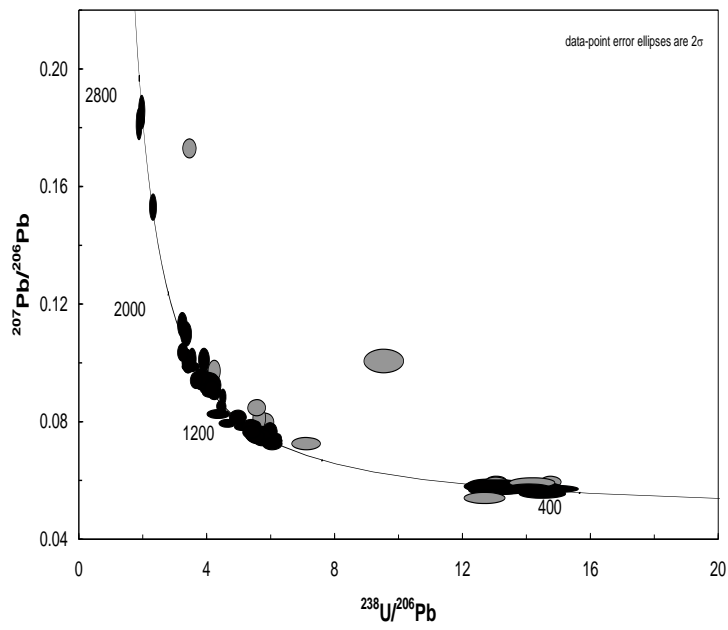

PDP of young (<500Ma) grains in N5065

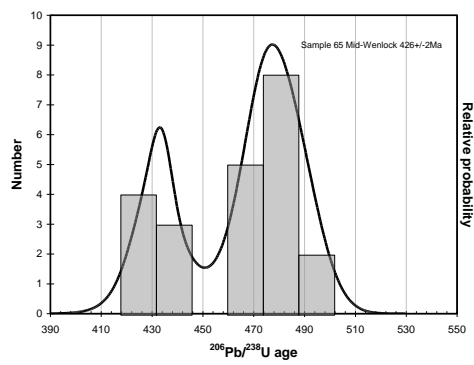

Age distribution for sample N5067

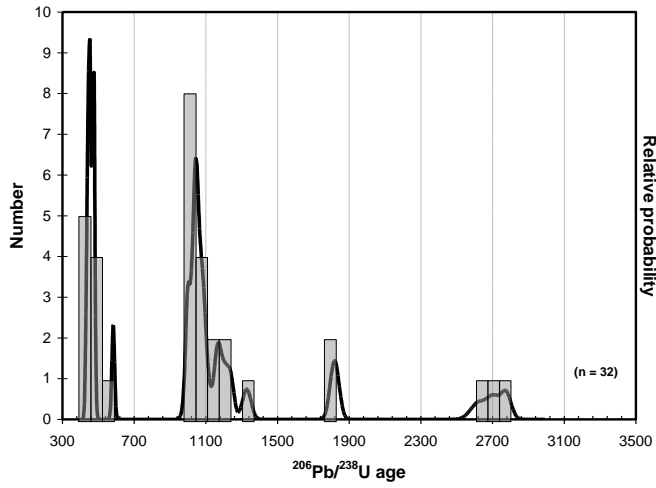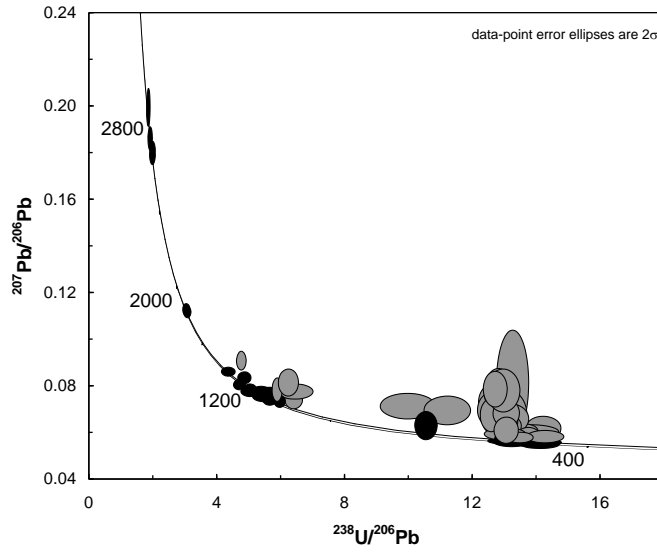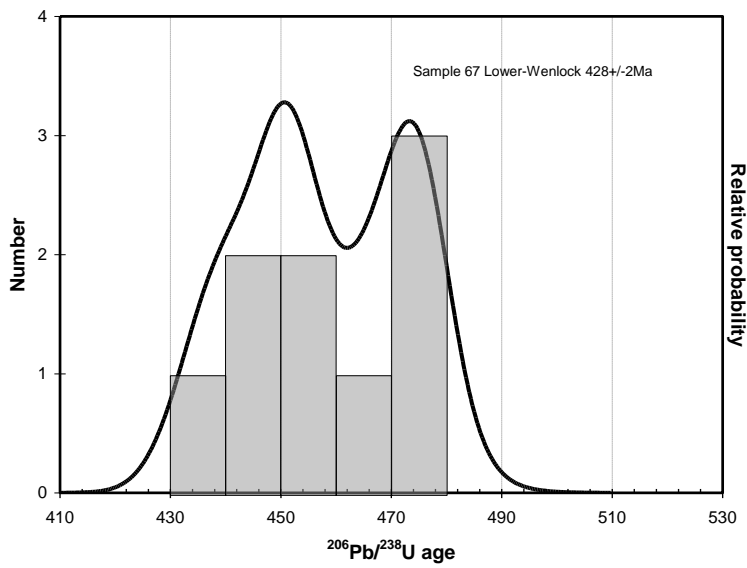

Age distribution plots for Sample N5068

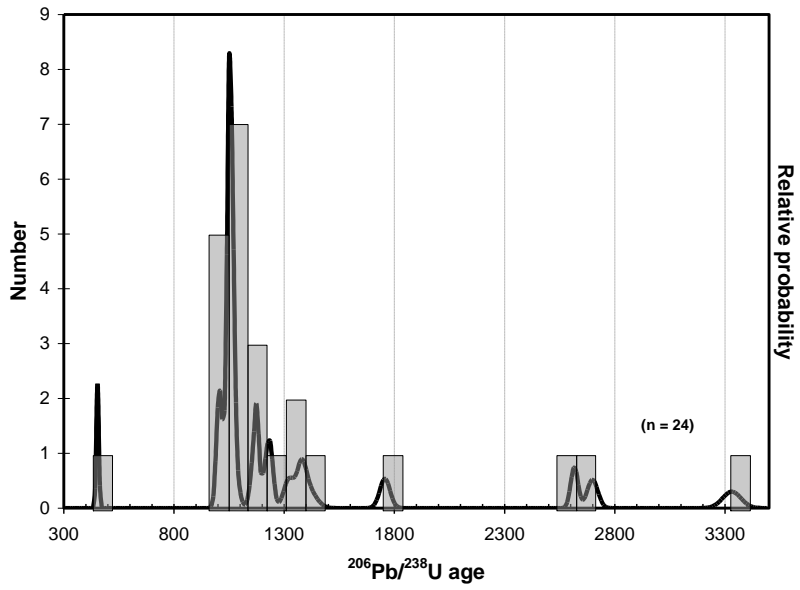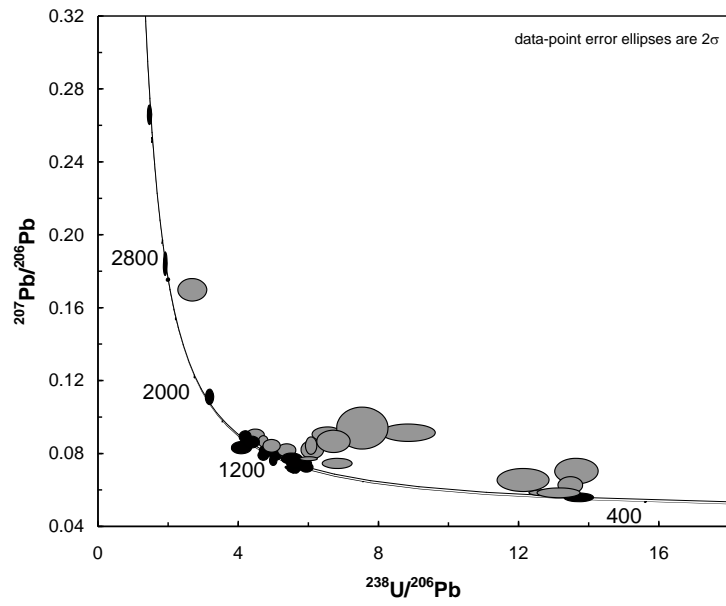

Age distribution plots for Sample N5071

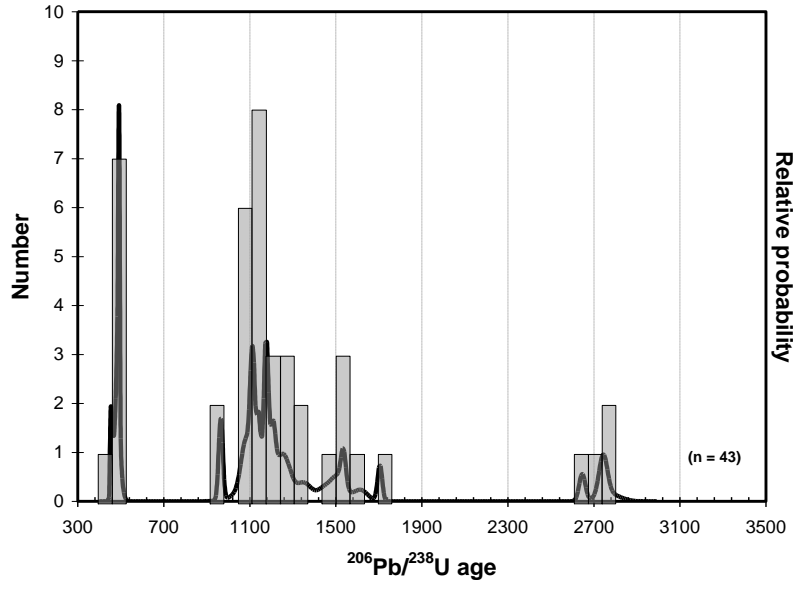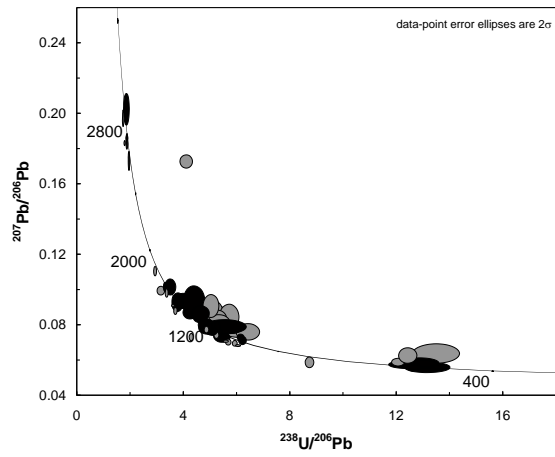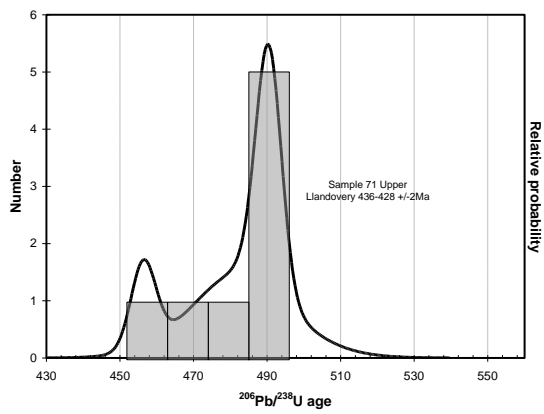

Age distribution plots for Sample N5075

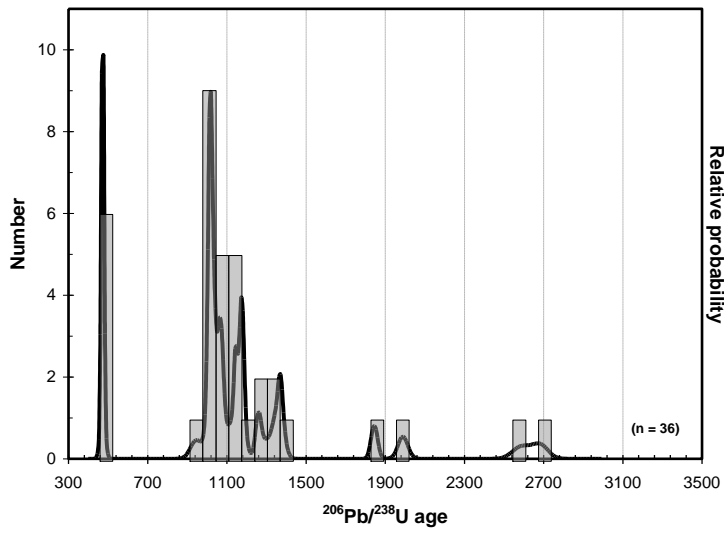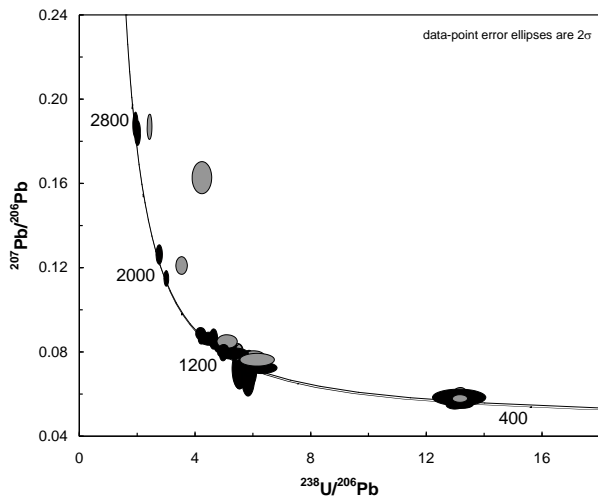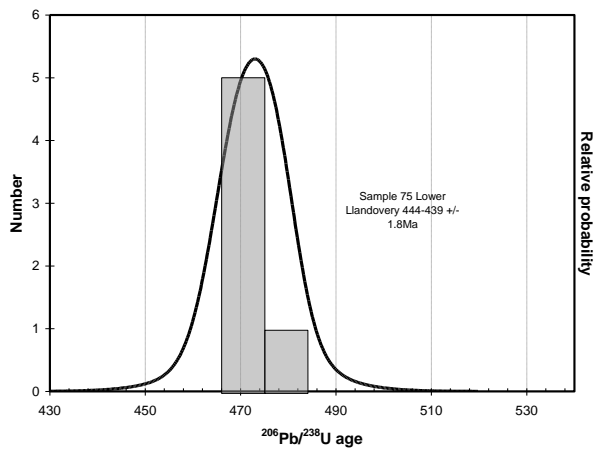

Supplement: Supplementary file 2 [file 1]
