# Supplementary material
Source: publisher figshare collection journal article supplement (https://geolsoc.figshare.com/articles/dataset/_/3454712)
Supplement: Supplementary file 1 [file 1]

Data Table for Phillips et al

| Sample N5065 | Signals                 |                         |                         |                       |                      | Isotopic ratios <sup>b</sup>           |      |                                      |      |                                      |                                      | Ages (Ma) |      |                                        |    |                                      |     |                                      |    |          |
|--------------|-------------------------|-------------------------|-------------------------|-----------------------|----------------------|----------------------------------------|------|--------------------------------------|------|--------------------------------------|--------------------------------------|-----------|------|----------------------------------------|----|--------------------------------------|-----|--------------------------------------|----|----------|
|              | <sup>204</sup> Pb (cps) | <sup>206</sup> Pb* (mV) | <sup>207</sup> Pb* (mV) | <sup>238</sup> U (mV) | U (ppm) <sup>a</sup> | <sup>207</sup> Pb*/ <sup>206</sup> Pb* | 1σ % | <sup>206</sup> Pb*/ <sup>238</sup> U | 1σ % | <sup>238</sup> U/ <sup>206</sup> Pb* | <sup>207</sup> Pb*/ <sup>235</sup> U | 1σ %      | Rho  | <sup>207</sup> Pb*/ <sup>206</sup> Pb* | 2σ | <sup>206</sup> Pb*/ <sup>238</sup> U | 2σ  | <sup>207</sup> Pb*/ <sup>235</sup> U | 2σ | % disc** |
| 65-A         | 160                     | 3.2                     | 0.18                    | 76                    | 189                  | 0.0585                                 | 1.4  | 0.0679                               | 0.9  | 14.73                                | 0.548                                | 1.7       | 0.52 | 548                                    | 62 | 424                                  | 7   | 443                                  | 12 | 22.7     |
| 65-B         | 118                     | 1.2                     | 0.09                    | 11                    | 26                   | 0.0789                                 | 1.6  | 0.1731                               | 2.0  | 5.78                                 | 1.884                                | 2.5       | 0.78 | 1170                                   | 63 | 1029                                 | 38  | 1075                                 | 34 | 12.1     |
| 65-C         | -37                     | 2.1                     | 0.16                    | 19                    | 47                   | 0.0803                                 | 2.1  | 0.1786                               | 1.5  | 5.60                                 | 1.978                                | 2.5       | 0.58 | 1205                                   | 82 | 1060                                 | 29  | 1108                                 | 35 | 12.0     |
| 65-E         | -72                     | 8.4                     | 0.69                    | 61                    | 152                  | 0.0876                                 | 1.2  | 0.2240                               | 1.0  | 4.46                                 | 2.705                                | 1.6       | 0.62 | 1374                                   | 48 | 1303                                 | 23  | 1330                                 | 24 | 5.1      |
| 65-F         | 149                     | 3.8                     | 0.27                    | 38                    | 47                   | 0.0747                                 | 1.6  | 0.1716                               | 1.7  | 5.83                                 | 1.768                                | 2.3       | 0.73 | 1061                                   | 62 | 1021                                 | 31  | 1034                                 | 30 | 3.8      |
| 65-G         | -15                     | 7.7                     | 0.54                    | 76                    | 95                   | 0.0747                                 | 1.5  | 0.1764                               | 1.6  | 5.67                                 | 1.816                                | 2.2       | 0.71 | 1060                                   | 62 | 1047                                 | 30  | 1051                                 | 29 | 1.3      |
| 65-H         | 510                     | 14.5                    | 1.36                    | 94                    | 118                  | 0.1003                                 | 1.7  | 0.2588                               | 1.8  | 3.86                                 | 3.580                                | 2.5       | 0.74 | 1630                                   | 62 | 1484                                 | 49  | 1545                                 | 40 | 9.0      |
| 65-J         | 266                     | 11.5                    | 1.06                    | 68                    | 85                   | 0.0997                                 | 1.5  | 0.2971                               | 2.2  | 3.37                                 | 4.085                                | 2.7       | 0.82 | 1619                                   | 58 | 1677                                 | 65  | 1651                                 | 45 | -3.6     |
| 65-K         | 193                     | 14.8                    | 1.39                    | 79                    | 99                   | 0.1006                                 | 1.5  | 0.2855                               | 1.5  | 3.50                                 | 3.958                                | 2.1       | 0.69 | 1634                                   | 57 | 1619                                 | 42  | 1626                                 | 35 | 1.0      |
| 65-L         | -11                     | 10.8                    | 0.77                    | 89                    | 111                  | 0.0765                                 | 1.5  | 0.1886                               | 1.3  | 5.30                                 | 1.988                                | 2.0       | 0.65 | 1107                                   | 62 | 1114                                 | 27  | 1112                                 | 28 | -0.6     |
| 65-M         | 6                       | 8.1                     | 0.57                    | 73                    | 91                   | 0.0756                                 | 1.7  | 0.1687                               | 1.5  | 5.93                                 | 1.759                                | 2.3       | 0.65 | 1085                                   | 70 | 1005                                 | 28  | 1030                                 | 30 | 7.4      |
| 65-N         | -2                      | 18.5                    | 1.61                    | 114                   | 143                  | 0.0933                                 | 1.6  | 0.2491                               | 1.6  | 4.02                                 | 3.203                                | 2.2       | 0.72 | 1494                                   | 59 | 1434                                 | 42  | 1458                                 | 35 | 4.0      |
| 65-O         | -71                     | 21.9                    | 2.29                    | 108                   | 135                  | 0.1123                                 | 1.5  | 0.3134                               | 1.8  | 3.19                                 | 4.855                                | 2.4       | 0.77 | 1837                                   | 56 | 1758                                 | 57  | 1794                                 | 41 | 4.3      |
| 65-Q         | -87                     | 6.5                     | 0.45                    | 55                    | 68                   | 0.0749                                 | 1.5  | 0.1800                               | 1.4  | 5.56                                 | 1.860                                | 2.1       | 0.68 | 1067                                   | 62 | 1067                                 | 28  | 1067                                 | 28 | 0.0      |
| 65-S         | 165                     | 11.2                    | 0.79                    | 95                    | 118                  | 0.0745                                 | 1.5  | 0.1807                               | 2.3  | 5.53                                 | 1.856                                | 2.8       | 0.83 | 1055                                   | 62 | 1071                                 | 46  | 1065                                 | 37 | -1.5     |
| 65-T         | 116                     | 17.2                    | 0.92                    | 345                   | 432                  | 0.0569                                 | 1.7  | 0.0788                               | 2.0  | 12.68                                | 0.619                                | 2.6       | 0.75 | 489                                    | 76 | 489                                  | 19  | 489                                  | 21 | -0.1     |
| 65-U         | 183                     | 2.1                     | 0.11                    | 44                    | 56                   | 0.0565                                 | 1.6  | 0.0749                               | 2.5  | 13.35                                | 0.583                                | 2.9       | 0.85 | 473                                    | 69 | 465                                  | 22  | 467                                  | 22 | 1.5      |
| 65-V         | 282                     | 6.6                     | 0.67                    | 34                    | 43                   | 0.1092                                 | 1.6  | 0.3012                               | 2.1  | 3.32                                 | 4.535                                | 2.6       | 0.81 | 1786                                   | 57 | 1698                                 | 64  | 1737                                 | 45 | 4.9      |
| 65-W         | 303                     | 15.4                    | 1.41                    | 102                   | 128                  | 0.0965                                 | 1.6  | 0.2388                               | 1.9  | 4.19                                 | 3.177                                | 2.5       | 0.78 | 1557                                   | 58 | 1380                                 | 48  | 1452                                 | 39 | 11.4     |
| 65-Y         | 300                     | 14.8                    | 0.79                    | 305                   | 382                  | 0.0567                                 | 1.5  | 0.0755                               | 2.4  | 13.24                                | 0.591                                | 2.8       | 0.84 | 480                                    | 68 | 469                                  | 21  | 471                                  | 21 | 2.2      |
| 65-Z         | 10                      | 8.1                     | 0.42                    | 167                   | 208                  | 0.0564                                 | 1.6  | 0.0756                               | 1.9  | 13.22                                | 0.588                                | 2.5       | 0.78 | 468                                    | 69 | 470                                  | 18  | 470                                  | 19 | -0.4     |
| 65-Ai        | 130                     | 17.7                    | 1.22                    | 155                   | 194                  | 0.0737                                 | 1.5  | 0.1766                               | 1.9  | 5.66                                 | 1.795                                | 2.5       | 0.78 | 1034                                   | 62 | 1048                                 | 37  | 1044                                 | 33 | -1.4     |
| 65-Bi        | 49                      | 11.6                    | 0.60                    | 262                   | 328                  | 0.0561                                 | 1.7  | 0.0690                               | 1.6  | 14.50                                | 0.533                                | 2.3       | 0.70 | 454                                    | 74 | 430                                  | 14  | 434                                  | 17 | 5.4      |
| 65-Di        | 285                     | 0.8                     | 0.04                    | 16                    | 20                   | 0.0574                                 | 1.6  | 0.0771                               | 2.1  | 12.97                                | 0.610                                | 2.7       | 0.79 | 505                                    | 71 | 479                                  | 20  | 483                                  | 21 | 5.3      |
| 65-I         | 173                     | 8.6                     | 0.62                    | 68                    | 212                  | 0.0784                                 | 0.7  | 0.2171                               | 2.3  | 4.61                                 | 2.347                                | 2.4       | 0.95 | 1158                                   | 28 | 1266                                 | 52  | 1227                                 | 34 | -9.4     |
| 65-Ci        | 439                     | 8.2                     | 0.71                    | 53                    | 166                  | 0.0944                                 | 0.7  | 0.2530                               | 3.4  | 3.95                                 | 3.292                                | 3.5       | 0.98 | 1515                                   | 27 | 1454                                 | 90  | 1479                                 | 56 | 4.1      |
| 65-Hi        | -164                    | 1.9                     | 0.14                    | 12                    | 39                   | 0.0817                                 | 0.7  | 0.2314                               | 3.4  | 4.32                                 | 2.608                                | 3.5       | 0.98 | 1239                                   | 29 | 1342                                 | 84  | 1303                                 | 53 | -8.3     |
| 65-Ii        | 36                      | 13.5                    | 1.10                    | 90                    | 280                  | 0.0890                                 | 0.7  | 0.2431                               | 2.8  | 4.11                                 | 2.981                                | 2.9       | 0.97 | 1403                                   | 27 | 1403                                 | 72  | 1403                                 | 45 | 0.0      |
| 65-Ji        | 50                      | 10.0                    | 1.71                    | 31                    | 98                   | 0.1826                                 | 0.7  | 0.5280                               | 2.2  | 1.89                                 | 13.290                               | 2.4       | 0.95 | 2676                                   | 24 | 2733                                 | 101 | 2700                                 | 46 | -2.1     |
| 65-Ki        | 246                     | 6.8                     | 0.62                    | 102                   | 319                  | 0.0999                                 | 1.7  | 0.1053                               | 2.7  | 9.50                                 | 1.449                                | 3.1       | 0.85 | 1622                                   | 62 | 645                                  | 33  | 910                                  | 39 | 60.2     |
| 65-Li        | 263                     | 2.8                     | 0.19                    | 27                    | 85                   | 0.0726                                 | 0.7  | 0.1676                               | 2.4  | 5.97                                 | 1.677                                | 2.5       | 0.96 | 1002                                   | 30 | 999                                  | 45  | 1000                                 | 33 | 0.3      |
| 65-Qi        | -71                     | 8.2                     | 0.68                    | 53                    | 167                  | 0.0900                                 | 0.7  | 0.2504                               | 2.5  | 3.99                                 | 3.108                                | 2.6       | 0.96 | 1426                                   | 27 | 1441                                 | 64  | 1435                                 | 40 | -1.0     |
| 65-Vi        | -27                     | 13.6                    | 2.12                    | 75                    | 235                  | 0.1727                                 | 0.8  | 0.2931                               | 2.4  | 3.41                                 | 6.981                                | 2.6       | 0.95 | 2584                                   | 26 | 1657                                 | 71  | 2109                                 | 46 | 35.9     |
| 65-Wi        | -69                     | 11.4                    | 1.03                    | 62                    | 194                  | 0.0980                                 | 0.7  | 0.2894                               | 3.2  | 3.45                                 | 3.910                                | 3.3       | 0.98 | 1586                                   | 27 | 1639                                 | 92  | 1616                                 | 54 | -3.3     |
| 65-Xi        | -141                    | 14.0                    | 1.00                    | 116                   | 361                  | 0.0775                                 | 0.7  | 0.1963                               | 2.3  | 5.09                                 | 2.098                                | 2.4       | 0.95 | 1135                                   | 28 | 1155                                 | 49  | 1148                                 | 34 | -1.8     |
| 65-Fi        | 85                      | 2.7                     | 0.19                    | 23                    | 30                   | 0.0773                                 | 1.0  | 0.1824                               | 1.3  | 5.48                                 | 1.945                                | 1.6       | 0.78 | 1130                                   | 40 | 1080                                 | 25  | 1097                                 | 22 | 4.4      |
| 65-Gi        | 222                     | 14.2                    | 0.97                    | 137                   | 174                  | 0.0732                                 | 1.0  | 0.1627                               | 1.0  | 6.15                                 | 1.643                                | 1.4       | 0.73 | 1021                                   | 39 | 972                                  | 19  | 987                                  | 18 | 4.8      |
| 65-Mi        | 30                      | 1.5                     | 0.08                    | 32                    | 41                   | 0.0574                                 | 1.0  | 0.0764                               | 1.4  | 13.09                                | 0.604                                | 1.7       | 0.82 | 506                                    | 44 | 474                                  | 13  | 480                                  | 13 | 6.2      |
| 65-Ni        | 1                       | 4.9                     | 0.39                    | 34                    | 43                   | 0.0843                                 | 1.0  | 0.2270                               | 1.4  | 4.40                                 | 2.640                                | 1.7       | 0.83 | 1300                                   | 37 | 1319                                 | 34  | 1312                                 | 26 | -1.4     |
| 65-Oi        | 37                      | 4.1                     | 0.23                    | 86                    | 109                  | 0.0589                                 | 1.1  | 0.0768                               | 1.0  | 13.02                                | 0.624                                | 1.5       | 0.66 | 563                                    | 48 | 477                                  | 9   | 492                                  | 12 | 15.2     |
| 65-Pi        | -190                    | 1.6                     | 0.09                    | 34                    | 43                   | 0.0586                                 | 1.1  | 0.0768                               | 1.1  | 13.01                                | 0.621                                | 1.5       | 0.70 | 553                                    | 47 | 477                                  | 10  | 491                                  | 12 | 13.7     |
| 65-Ri        | 95                      | 8.1                     | 0.43                    | 192                   | 243                  | 0.0561                                 | 1.0  | 0.0684                               | 2.7  | 14.61                                | 0.530                                | 2.9       | 0.94 | 457                                    | 43 | 427                                  | 23  | 432                                  | 21 | 6.7      |
| 65-Si        | 1                       | 18.6                    | 1.29                    | 160                   | 203                  | 0.0747                                 | 1.0  | 0.1873                               | 1.4  | 5.34                                 | 1.928                                | 1.7       | 0.83 | 1059                                   | 38 | 1107                                 | 29  | 1091                                 | 23 | -4.5     |
| 65-Ti        | -9                      | 5.5                     | 0.30                    | 125                   | 159                  | 0.0572                                 | 1.2  | 0.0696                               | 0.9  | 14.37                                | 0.549                                | 1.5       | 0.61 | 499                                    | 52 | 434                                  | 8   | 444                                  | 11 | 13.0     |
| 65-Ui        | -88                     | 5.9                     | 0.41                    | 54                    | 68                   | 0.0737                                 | 1.0  | 0.1772                               | 1.0  | 5.64                                 | 1.801                                | 1.4       | 0.72 | 1034                                   | 39 | 1052                                 | 19  | 1046                                 | 18 | -1.7     |
| 65-Zi        | 340                     | 7.0                     | 0.28                    | 99                    | 220                  | 0.0561                                 | 1.2  | 0.0690                               | 2.0  | 14.49                                | 0.534                                | 2.4       | 0.86 | 456                                    | 52 | 430                                  | 17  | 434                                  | 17 | 5.7      |
| 65-Aii       | -21                     | 5.2                     | 0.33                    | 21                    | 48                   | 0.0893                                 | 1.2  | 0.2391                               | 2.1  | 4.18                                 | 2.943                                | 2.4       | 0.86 | 1410                                   | 46 | 1382                                 | 51  | 1393                                 | 37 | 2.0      |
| 65-Bii       | -10                     | 6.4                     | 0.34                    | 35                    | 78                   | 0.0751                                 | 1.2  | 0.1781                               | 2.1  | 5.61                                 | 1.844                                | 2.4       | 0.87 | 1071                                   | 47 | 1057                                 | 41  | 1061                                 | 32 | 1.3      |
| 65-Cii       | 74                      | 7.2                     | 0.29                    | 92                    | 203                  | 0.0570                                 | 1.2  | 0.0773                               | 2.0  | 12.93                                | 0.608                                | 2.4       | 0.86 | 492                                    | 52 | 480                                  | 19  | 482                                  | 18 | 2.4      |
| 65-Dii       | -238                    | 2.8                     | 0.15                    | 16                    | 36                   | 0.0737                                 | 1.2  | 0.1735                               | 2.0  | 5.76                                 | 1.762                                | 2.3       | 0.86 | 1033                                   | 48 | 1031                                 | 39  | 1032                                 | 31 | 0.1      |

|       |      |      |      |     |     |        |     |        |     |       |        |     |      |      |    |      |    |      |    |       |
|-------|------|------|------|-----|-----|--------|-----|--------|-----|-------|--------|-----|------|------|----|------|----|------|----|-------|
| Eii   | -52  | 6.8  | 0.28 | 89  | 198 | 0.0570 | 1.2 | 0.0761 | 2.1 | 13.13 | 0.599  | 2.4 | 0.87 | 492  | 52 | 473  | 19 | 476  | 19 | 3.9   |
| Fii   | 74   | 9.8  | 0.52 | 56  | 125 | 0.0743 | 1.2 | 0.1767 | 2.1 | 5.66  | 1.811  | 2.4 | 0.87 | 1051 | 47 | 1049 | 40 | 1049 | 32 | 0.2   |
| Gii   | 128  | 15.6 | 0.90 | 78  | 173 | 0.0807 | 1.2 | 0.2026 | 2.2 | 4.94  | 2.253  | 2.5 | 0.88 | 1214 | 46 | 1189 | 49 | 1198 | 36 | 2.0   |
| Hii   | -80  | 8.9  | 1.18 | 17  | 39  | 0.1856 | 1.2 | 0.5204 | 2.1 | 1.92  | 13.321 | 2.4 | 0.87 | 2704 | 38 | 2701 | 92 | 2703 | 46 | 0.1   |
| Iii   | 268  | 7.1  | 0.29 | 93  | 206 | 0.0560 | 1.2 | 0.0772 | 2.1 | 12.96 | 0.596  | 2.4 | 0.86 | 454  | 53 | 479  | 19 | 475  | 18 | -5.6  |
| Jii   | 316  | 15.1 | 1.10 | 51  | 112 | 0.1011 | 1.2 | 0.2998 | 2.0 | 3.34  | 4.178  | 2.3 | 0.86 | 1644 | 44 | 1690 | 60 | 1670 | 39 | -2.8  |
| Kii   | 390  | 19.8 | 1.30 | 77  | 170 | 0.0927 | 1.2 | 0.2661 | 2.0 | 3.76  | 3.402  | 2.4 | 0.86 | 1483 | 44 | 1521 | 55 | 1505 | 38 | -2.6  |
| Lii   | 250  | 20.6 | 1.38 | 80  | 178 | 0.0945 | 1.3 | 0.2651 | 2.3 | 3.77  | 3.452  | 2.6 | 0.87 | 1517 | 47 | 1516 | 61 | 1516 | 42 | 0.1   |
| Mii   | 108  | 3.0  | 0.12 | 45  | 101 | 0.0544 | 1.2 | 0.0692 | 2.1 | 14.46 | 0.519  | 2.4 | 0.86 | 389  | 53 | 431  | 17 | 425  | 17 | -10.8 |
| Nii   | -175 | 17.0 | 1.19 | 60  | 133 | 0.0987 | 1.2 | 0.2968 | 2.0 | 3.37  | 4.040  | 2.3 | 0.86 | 1600 | 43 | 1675 | 60 | 1642 | 39 | -4.7  |
| Oii   | -56  | 10.3 | 0.41 | 135 | 299 | 0.0555 | 1.2 | 0.0782 | 2.0 | 12.79 | 0.599  | 2.4 | 0.86 | 434  | 52 | 485  | 19 | 477  | 18 | -11.8 |
| Pii   | 79   | 10.0 | 1.09 | 24  | 52  | 0.1527 | 1.2 | 0.4416 | 2.0 | 2.26  | 9.297  | 2.4 | 0.86 | 2376 | 40 | 2358 | 81 | 2368 | 44 | 0.8   |
| Qii   | -166 | 2.6  | 0.11 | 37  | 81  | 0.0575 | 1.2 | 0.0759 | 2.1 | 13.17 | 0.602  | 2.4 | 0.86 | 512  | 54 | 472  | 19 | 479  | 19 | 7.9   |
| Rii   | -313 | 1.0  | 0.06 | 6   | 13  | 0.0774 | 1.3 | 0.1875 | 2.1 | 5.33  | 2.002  | 2.4 | 0.85 | 1132 | 50 | 1108 | 42 | 1116 | 34 | 2.2   |
| Sii   | -193 | 5.7  | 0.29 | 37  | 81  | 0.0716 | 1.2 | 0.1665 | 2.1 | 6.01  | 1.643  | 2.4 | 0.87 | 973  | 48 | 993  | 39 | 987  | 31 | -2.0  |
| Tii   | -164 | 2.8  | 0.11 | 39  | 87  | 0.0566 | 1.2 | 0.0767 | 2.1 | 13.04 | 0.598  | 2.4 | 0.86 | 475  | 54 | 476  | 19 | 476  | 19 | -0.3  |
| Yii   | -405 | 11.9 | 0.86 | 42  | 94  | 0.1029 | 1.2 | 0.3129 | 2.0 | 3.20  | 4.439  | 2.3 | 0.86 | 1677 | 43 | 1755 | 62 | 1720 | 39 | -4.6  |
| Zii   | -462 | 12.9 | 0.85 | 52  | 115 | 0.0933 | 1.2 | 0.2759 | 2.0 | 3.62  | 3.549  | 2.3 | 0.86 | 1494 | 45 | 1571 | 56 | 1538 | 38 | -5.2  |
| Biii  | -51  | 1.0  | 0.04 | 15  | 32  | 0.0530 | 1.5 | 0.0791 | 2.0 | 12.65 | 0.578  | 2.5 | 0.80 | 329  | 68 | 491  | 19 | 463  | 19 | -49.1 |
| Ciii  | 160  | 10.5 | 0.62 | 65  | 145 | 0.0839 | 1.3 | 0.1812 | 2.0 | 5.52  | 2.096  | 2.4 | 0.83 | 1290 | 51 | 1074 | 40 | 1147 | 34 | 16.8  |
| Diii  | 97   | 5.7  | 0.37 | 27  | 60  | 0.0916 | 1.5 | 0.2386 | 2.1 | 4.19  | 3.013  | 2.6 | 0.81 | 1459 | 57 | 1379 | 52 | 1411 | 40 | 5.5   |
| Eiii  | 301  | 18.4 | 0.93 | 149 | 330 | 0.0716 | 1.2 | 0.1413 | 2.6 | 7.08  | 1.396  | 2.9 | 0.90 | 976  | 50 | 852  | 42 | 887  | 35 | 12.7  |
| Fiii  | 4    | 5.1  | 0.20 | 75  | 166 | 0.0569 | 1.2 | 0.0781 | 2.1 | 12.81 | 0.613  | 2.4 | 0.87 | 488  | 53 | 485  | 20 | 485  | 19 | 0.7   |
| Giii  | 196  | 5.4  | 0.21 | 90  | 199 | 0.0561 | 1.3 | 0.0694 | 2.0 | 14.42 | 0.537  | 2.4 | 0.85 | 457  | 55 | 432  | 17 | 436  | 17 | 5.3   |
| Hiii  | 751  | 5.3  | 0.22 | 86  | 191 | 0.0582 | 1.3 | 0.0707 | 2.0 | 14.14 | 0.568  | 2.4 | 0.85 | 539  | 54 | 441  | 17 | 457  | 18 | 18.2  |
| Iiii  | 303  | 22.3 | 1.16 | 140 | 310 | 0.0741 | 1.2 | 0.1824 | 2.1 | 5.48  | 1.864  | 2.4 | 0.87 | 1045 | 47 | 1080 | 41 | 1068 | 32 | -3.4  |
| Jiii  | 64   | 4.3  | 0.17 | 61  | 136 | 0.0570 | 1.2 | 0.0791 | 2.0 | 12.64 | 0.621  | 2.4 | 0.86 | 490  | 52 | 491  | 19 | 491  | 19 | -0.2  |
| Kiii  | 15   | 7.0  | 0.28 | 102 | 227 | 0.0574 | 1.2 | 0.0782 | 2.0 | 12.79 | 0.619  | 2.4 | 0.86 | 508  | 53 | 485  | 19 | 489  | 19 | 4.5   |
| Liii  | 3    | 11.8 | 0.46 | 190 | 421 | 0.0561 | 1.2 | 0.0713 | 2.1 | 14.03 | 0.551  | 2.4 | 0.86 | 456  | 54 | 444  | 18 | 446  | 18 | 2.7   |
| 65-Yi | -139 | 18.2 | 0.98 | 96  | 409 | 0.0755 | 1.2 | 0.1870 | 2.1 | 5.35  | 1.948  | 2.4 | 0.87 | 1083 | 47 | 1105 | 43 | 1098 | 33 | -2.1  |
| Aiii  | 154  | 16.6 | 2.09 | 34  | 145 | 0.1812 | 1.2 | 0.5476 | 2.0 | 1.83  | 13.677 | 2.4 | 0.86 | 2663 | 39 | 2815 | 93 | 2728 | 45 | -5.7  |
| Wii   | -242 | 15.1 | 0.95 | 69  | 296 | 0.0905 | 1.2 | 0.2432 | 2.0 | 4.11  | 3.037  | 2.4 | 0.86 | 1437 | 44 | 1404 | 52 | 1417 | 37 | 2.3   |

**Sample N5067**

|      |      |     |      |     |     |        |      |        |     |       |        |      |      |      |     |      |    |      |     |      |
|------|------|-----|------|-----|-----|--------|------|--------|-----|-------|--------|------|------|------|-----|------|----|------|-----|------|
| 67-A | 128  | 4.2 | 0.33 | 39  | 272 | 0.0784 | 1.1  | 0.1985 | 2.2 | 5.04  | 2.145  | 2.4  | 0.89 | 1157 | 44  | 1167 | 46 | 1163 | 34  | -0.9 |
| 67-B | 97   | 1.6 | 0.12 | 17  | 119 | 0.0758 | 1.3  | 0.1678 | 2.0 | 5.96  | 1.752  | 2.4  | 0.83 | 1089 | 53  | 1000 | 37 | 1028 | 32  | 8.2  |
| 67-C | 148  | 1.3 | 0.10 | 13  | 93  | 0.0758 | 1.2  | 0.1722 | 2.3 | 5.81  | 1.799  | 2.6  | 0.88 | 1089 | 48  | 1024 | 44 | 1045 | 34  | 5.9  |
| 67-D | 159  | 3.3 | 0.25 | 40  | 275 | 0.0749 | 2.2  | 0.1559 | 1.8 | 6.41  | 1.611  | 2.8  | 0.64 | 1067 | 87  | 934  | 31 | 974  | 36  | 12.4 |
| 67-E | 128  | 0.5 | 0.03 | 12  | 85  | 0.0614 | 2.4  | 0.0753 | 2.1 | 13.27 | 0.638  | 3.2  | 0.67 | 653  | 102 | 468  | 19 | 501  | 26  | 28.3 |
| 67-F | 128  | 2.8 | 0.16 | 71  | 493 | 0.0565 | 1.2  | 0.0723 | 1.9 | 13.84 | 0.563  | 2.2  | 0.85 | 474  | 51  | 450  | 16 | 454  | 16  | 5.0  |
| 67-G | 179  | 0.4 | 0.04 | 10  | 72  | 0.0820 | 11.3 | 0.0754 | 1.6 | 13.27 | 0.852  | 11.4 | 0.14 | 1245 | 442 | 468  | 14 | 626  | 112 | 62.4 |
| 67-H | 335  | 1.5 | 0.09 | 36  | 251 | 0.0574 | 1.2  | 0.0760 | 1.5 | 13.16 | 0.602  | 1.9  | 0.80 | 508  | 51  | 472  | 14 | 478  | 15  | 7.2  |
| 67-I | 206  | 1.2 | 0.09 | 11  | 75  | 0.0791 | 1.2  | 0.1983 | 1.7 | 5.04  | 2.163  | 2.1  | 0.81 | 1175 | 49  | 1166 | 37 | 1169 | 30  | 0.7  |
| 67-J | 68   | 0.6 | 0.04 | 17  | 115 | 0.0626 | 3.4  | 0.0702 | 1.6 | 14.24 | 0.606  | 3.7  | 0.42 | 695  | 144 | 438  | 13 | 481  | 29  | 37.0 |
| 67-K | 14   | 4.3 | 0.81 | 15  | 105 | 0.1864 | 1.1  | 0.5216 | 1.6 | 1.92  | 13.407 | 1.9  | 0.82 | 2711 | 36  | 2706 | 69 | 2709 | 37  | 0.2  |
| 67-L | 182  | 0.7 | 0.05 | 16  | 114 | 0.0683 | 6.4  | 0.0761 | 1.8 | 13.14 | 0.716  | 6.6  | 0.27 | 878  | 265 | 473  | 17 | 549  | 58  | 46.1 |
| 67-M | 53   | 5.0 | 0.28 | 131 | 908 | 0.0565 | 1.1  | 0.0702 | 1.6 | 14.25 | 0.547  | 2.0  | 0.81 | 472  | 50  | 437  | 13 | 443  | 14  | 7.4  |
| 67-N | -170 | 2.1 | 0.16 | 22  | 152 | 0.0755 | 1.1  | 0.1750 | 2.3 | 5.71  | 1.821  | 2.5  | 0.89 | 1081 | 46  | 1040 | 44 | 1053 | 34  | 3.8  |
| 67-O | 72   | 0.6 | 0.04 | 14  | 97  | 0.0640 | 2.9  | 0.0767 | 2.1 | 13.03 | 0.677  | 3.6  | 0.59 | 741  | 122 | 477  | 19 | 525  | 30  | 35.6 |
| 67-P | -60  | 2.1 | 0.12 | 51  | 355 | 0.0570 | 1.2  | 0.0730 | 1.6 | 13.69 | 0.574  | 2.0  | 0.81 | 491  | 51  | 454  | 14 | 460  | 15  | 7.4  |
| 67-Q | -96  | 4.9 | 0.40 | 43  | 297 | 0.0813 | 1.1  | 0.2119 | 1.6 | 4.72  | 2.375  | 2.0  | 0.83 | 1228 | 43  | 1239 | 37 | 1235 | 28  | -0.9 |
| 67-R | 11   | 0.7 | 0.04 | 18  | 127 | 0.0596 | 2.4  | 0.0716 | 1.9 | 13.96 | 0.589  | 3.1  | 0.61 | 590  | 106 | 446  | 16 | 470  | 23  | 24.4 |
| 67-S | -167 | 0.4 | 0.03 | 8   | 58  | 0.0738 | 4.9  | 0.0782 | 1.9 | 12.78 | 0.796  | 5.2  | 0.36 | 1035 | 197 | 486  | 18 | 594  | 48  | 53.1 |
| 67-T | -14  | 7.0 | 1.25 | 26  | 178 | 0.1801 | 1.1  | 0.5019 | 2.0 | 1.99  | 12.465 | 2.3  | 0.87 | 2654 | 37  | 2622 | 87 | 2640 | 44  | 1.2  |
| 67-U | 3    | 3.4 | 0.19 | 89  | 619 | 0.0557 | 1.2  | 0.0708 | 1.7 | 14.12 | 0.544  | 2.1  | 0.81 | 442  | 55  | 441  | 15 | 441  | 15  | 0.1  |
| 67-V | -170 | 5.1 | 0.43 | 38  | 206 | 0.0868 | 0.9  | 0.2288 | 2.0 | 4.37  | 2.737  | 2.2  | 0.92 | 1355 | 33  | 1328 | 48 | 1339 | 33  | 2.0  |

|        |      |      |      |     |     |        |     |        |     |       |        |     |      |      |     |      |    |      |    |      |
|--------|------|------|------|-----|-----|--------|-----|--------|-----|-------|--------|-----|------|------|-----|------|----|------|----|------|
| 67-W   | -115 | 1.5  | 0.10 | 38  | 206 | 0.0612 | 2.0 | 0.0722 | 2.5 | 13.84 | 0.609  | 3.2 | 0.79 | 645  | 86  | 450  | 22 | 483  | 25 | 30.3 |
| 67-X   | -170 | 0.8  | 0.06 | 8   | 41  | 0.0783 | 1.2 | 0.1859 | 2.2 | 5.38  | 2.006  | 2.5 | 0.88 | 1154 | 46  | 1099 | 45 | 1118 | 34 | 4.8  |
| 67-Y   | -376 | 0.5  | 0.05 | 5   | 29  | 0.0765 | 1.4 | 0.1828 | 2.6 | 5.47  | 1.929  | 2.9 | 0.88 | 1109 | 54  | 1082 | 51 | 1091 | 39 | 2.4  |
| 67-Z   | -363 | 8.5  | 0.63 | 81  | 444 | 0.0754 | 0.9 | 0.1745 | 1.8 | 5.73  | 1.814  | 2.0 | 0.90 | 1078 | 35  | 1037 | 35 | 1050 | 27 | 3.8  |
| 67-Ai  | -508 | 1.7  | 0.09 | 36  | 198 | 0.0572 | 1.0 | 0.0757 | 2.2 | 13.21 | 0.598  | 2.5 | 0.90 | 501  | 46  | 471  | 20 | 476  | 19 | 6.1  |
| 67-Bi  | -327 | 5.4  | 0.41 | 53  | 286 | 0.0760 | 1.0 | 0.1754 | 1.6 | 5.70  | 1.838  | 1.8 | 0.85 | 1095 | 38  | 1042 | 30 | 1059 | 24 | 4.9  |
| 67-Ci  | -335 | 0.5  | 0.04 | 5   | 27  | 0.0752 | 1.5 | 0.1763 | 1.7 | 5.67  | 1.829  | 2.2 | 0.75 | 1074 | 60  | 1047 | 32 | 1056 | 30 | 2.5  |
| 67-Di  | -484 | 2.3  | 0.14 | 51  | 277 | 0.0592 | 1.4 | 0.0759 | 1.7 | 13.18 | 0.620  | 2.2 | 0.76 | 575  | 63  | 472  | 15 | 490  | 18 | 17.9 |
| 67-Fi  | 75   | 4.3  | 0.32 | 39  | 212 | 0.0766 | 1.0 | 0.1826 | 1.6 | 5.48  | 1.929  | 1.9 | 0.85 | 1111 | 39  | 1081 | 32 | 1091 | 25 | 2.6  |
| 67-Gi  | 62   | 2.7  | 0.24 | 23  | 124 | 0.0842 | 1.2 | 0.2056 | 1.7 | 4.86  | 2.388  | 2.1 | 0.82 | 1298 | 47  | 1205 | 38 | 1239 | 31 | 7.1  |
| 67-Ii  | 60   | 1.3  | 0.10 | 12  | 67  | 0.0780 | 1.2 | 0.1764 | 1.5 | 5.67  | 1.896  | 1.9 | 0.77 | 1146 | 48  | 1047 | 28 | 1080 | 25 | 8.6  |
| 67-Ji  | 299  | 3.0  | 0.19 | 70  | 384 | 0.0616 | 2.0 | 0.0735 | 1.4 | 13.60 | 0.624  | 2.4 | 0.57 | 659  | 85  | 457  | 12 | 492  | 19 | 30.6 |
| 67-Ki  | 179  | 5.0  | 0.38 | 44  | 242 | 0.0783 | 1.0 | 0.1810 | 1.9 | 5.53  | 1.954  | 2.2 | 0.90 | 1155 | 38  | 1072 | 38 | 1100 | 29 | 7.1  |
| 67-Mi  | 171  | 2.3  | 0.26 | 12  | 66  | 0.1133 | 0.9 | 0.3270 | 1.5 | 3.06  | 5.107  | 1.8 | 0.86 | 1853 | 33  | 1824 | 48 | 1837 | 30 | 1.6  |
| 67-Ni  | 252  | 0.6  | 0.04 | 14  | 77  | 0.0667 | 3.8 | 0.0757 | 1.8 | 13.20 | 0.697  | 4.2 | 0.42 | 829  | 160 | 471  | 16 | 537  | 36 | 43.2 |
| 67-Oi  | 362  | 1.3  | 0.10 | 13  | 73  | 0.0783 | 1.6 | 0.1549 | 3.5 | 6.46  | 1.673  | 3.9 | 0.91 | 1155 | 65  | 928  | 61 | 998  | 51 | 19.6 |
| 67-Pi  | 87   | 11.4 | 1.25 | 61  | 330 | 0.1122 | 0.9 | 0.3250 | 1.5 | 3.08  | 5.029  | 1.8 | 0.87 | 1836 | 31  | 1814 | 48 | 1824 | 30 | 1.2  |
| 67-Qi  | -76  | 1.7  | 0.10 | 39  | 194 | 0.0591 | 2.0 | 0.0723 | 1.5 | 13.83 | 0.589  | 2.5 | 0.60 | 570  | 86  | 450  | 13 | 470  | 19 | 21.0 |
| 67-Ri  | -40  | 3.1  | 0.22 | 32  | 156 | 0.0741 | 1.5 | 0.1675 | 1.2 | 5.97  | 1.712  | 1.9 | 0.63 | 1045 | 60  | 998  | 22 | 1013 | 25 | 4.5  |
| 67-Ti  | 55   | 3.2  | 0.22 | 52  | 257 | 0.0720 | 3.1 | 0.1001 | 3.5 | 9.99  | 0.994  | 4.7 | 0.75 | 987  | 127 | 615  | 42 | 701  | 49 | 37.7 |
| 67-Ui  | -94  | 0.5  | 0.03 | 11  | 54  | 0.0636 | 2.9 | 0.0762 | 1.3 | 13.13 | 0.668  | 3.2 | 0.41 | 729  | 123 | 473  | 12 | 519  | 26 | 35.1 |
| 67-Vi  | -45  | 1.0  | 0.06 | 23  | 112 | 0.0599 | 2.1 | 0.0727 | 1.0 | 13.76 | 0.600  | 2.3 | 0.44 | 600  | 91  | 452  | 9  | 477  | 18 | 24.6 |
| 67-Wi  | -79  | 0.7  | 0.05 | 14  | 71  | 0.0706 | 4.6 | 0.0787 | 1.7 | 12.70 | 0.766  | 4.9 | 0.35 | 945  | 189 | 488  | 16 | 578  | 44 | 48.3 |
| 67-Xi  | -46  | 4.8  | 0.29 | 106 | 526 | 0.0601 | 1.8 | 0.0767 | 2.0 | 13.04 | 0.636  | 2.7 | 0.75 | 608  | 77  | 476  | 19 | 500  | 22 | 21.7 |
| 67-Yi  | 83   | 1.3  | 0.09 | 23  | 114 | 0.0703 | 3.6 | 0.0891 | 2.6 | 11.22 | 0.863  | 4.4 | 0.59 | 936  | 147 | 550  | 28 | 632  | 43 | 41.2 |
| 67-Zi  | 103  | 0.6  | 0.05 | 14  | 70  | 0.0783 | 5.1 | 0.0780 | 1.4 | 12.83 | 0.842  | 5.2 | 0.27 | 1155 | 201 | 484  | 13 | 620  | 50 | 58.1 |
| 67-Aii | 105  | 1.1  | 0.08 | 24  | 117 | 0.0682 | 4.2 | 0.0794 | 1.1 | 12.60 | 0.747  | 4.4 | 0.26 | 875  | 174 | 492  | 11 | 566  | 39 | 43.7 |
| 67-Bii | 315  | 0.7  | 0.04 | 15  | 75  | 0.0584 | 1.8 | 0.0765 | 1.1 | 13.06 | 0.616  | 2.1 | 0.54 | 543  | 77  | 475  | 10 | 487  | 16 | 12.5 |
| 67-Cii | 182  | 5.3  | 0.29 | 124 | 611 | 0.0569 | 1.5 | 0.0725 | 1.1 | 13.80 | 0.569  | 1.8 | 0.61 | 488  | 64  | 451  | 10 | 457  | 14 | 7.6  |
| 67-Dii | 110  | 0.3  | 0.02 | 8   | 38  | 0.0653 | 3.2 | 0.0763 | 1.0 | 13.11 | 0.687  | 3.4 | 0.29 | 786  | 136 | 474  | 9  | 531  | 28 | 39.7 |
| 67-Eii | 165  | 2.2  | 0.15 | 48  | 238 | 0.0690 | 3.6 | 0.0765 | 1.3 | 13.07 | 0.728  | 3.9 | 0.34 | 900  | 150 | 475  | 12 | 555  | 34 | 47.2 |
| 67-Gii | 450  | 8.2  | 0.63 | 82  | 405 | 0.0791 | 2.6 | 0.1695 | 1.1 | 5.90  | 1.849  | 2.8 | 0.40 | 1175 | 102 | 1009 | 21 | 1063 | 38 | 14.1 |
| 67-Hii | -48  | 3.8  | 0.22 | 93  | 458 | 0.0591 | 1.8 | 0.0700 | 1.7 | 14.29 | 0.570  | 2.5 | 0.68 | 570  | 78  | 436  | 14 | 458  | 18 | 23.5 |
| 67-Iii | 61   | 2.0  | 0.18 | 16  | 80  | 0.0915 | 1.8 | 0.2094 | 1.2 | 4.78  | 2.642  | 2.2 | 0.56 | 1457 | 69  | 1226 | 27 | 1312 | 33 | 15.9 |
| 67-Jii | 33   | 1.2  | 0.07 | 27  | 133 | 0.0572 | 1.7 | 0.0755 | 1.8 | 13.24 | 0.596  | 2.5 | 0.73 | 500  | 75  | 469  | 16 | 475  | 19 | 6.2  |
| 67-Kii | -76  | 3.8  | 0.22 | 88  | 437 | 0.0586 | 1.6 | 0.0740 | 1.2 | 13.51 | 0.598  | 2.0 | 0.61 | 554  | 69  | 460  | 11 | 476  | 15 | 16.9 |
| 67-Lii | -105 | 0.7  | 0.04 | 15  | 72  | 0.0617 | 3.7 | 0.0765 | 1.2 | 13.07 | 0.651  | 3.9 | 0.31 | 665  | 158 | 475  | 11 | 509  | 32 | 28.5 |
| 67-Nii | 188  | 0.5  | 0.03 | 8   | 42  | 0.0638 | 3.9 | 0.0947 | 1.4 | 10.56 | 0.833  | 4.1 | 0.33 | 735  | 164 | 583  | 15 | 615  | 39 | 20.6 |
| 67-Oii | 35   | 0.9  | 0.07 | 21  | 103 | 0.0788 | 4.8 | 0.0771 | 1.6 | 12.98 | 0.837  | 5.1 | 0.33 | 1166 | 190 | 479  | 15 | 617  | 48 | 59.0 |
| 67-Pii | 253  | 11.9 | 2.30 | 37  | 182 | 0.1996 | 1.6 | 0.5382 | 1.2 | 1.86  | 14.810 | 2.1 | 0.60 | 2823 | 54  | 2776 | 56 | 2803 | 40 | 1.7  |
| 67-Qii | 143  | 3.3  | 0.27 | 35  | 173 | 0.0821 | 2.8 | 0.1600 | 2.1 | 6.25  | 1.813  | 3.5 | 0.59 | 1249 | 111 | 957  | 37 | 1050 | 47 | 23.4 |
| 67-Rii | 194  | 1.0  | 0.08 | 23  | 113 | 0.0793 | 3.9 | 0.0786 | 1.2 | 12.73 | 0.859  | 4.1 | 0.29 | 1179 | 155 | 488  | 11 | 630  | 39 | 58.6 |

**Sample N5068**

|      |      |      |      |    |     |        |     |        |     |       |        |     |      |      |     |      |    |      |    |      |
|------|------|------|------|----|-----|--------|-----|--------|-----|-------|--------|-----|------|------|-----|------|----|------|----|------|
| 68 B | -54  | 1.6  | 0.10 | 13 | 92  | 0.0737 | 0.9 | 0.1753 | 2.5 | 5.71  | 1.782  | 2.7 | 0.95 | 1034 | 35  | 1041 | 49 | 1039 | 35 | -0.7 |
| 68 A | -78  | 1.0  | 0.06 | 19 | 135 | 0.0597 | 1.2 | 0.0777 | 1.8 | 12.87 | 0.639  | 2.2 | 0.84 | 592  | 51  | 482  | 17 | 502  | 17 | 18.5 |
| 68 V | -127 | 11.3 | 2.72 | 24 | 170 | 0.2661 | 0.8 | 0.6765 | 1.6 | 1.48  | 24.819 | 1.8 | 0.89 | 3283 | 26  | 3331 | 83 | 3301 | 36 | -1.5 |
| 68 F | 95   | 1.0  | 0.06 | 20 | 74  | 0.0716 | 4.0 | 0.0732 | 1.9 | 13.65 | 0.723  | 4.4 | 0.42 | 974  | 164 | 456  | 16 | 552  | 38 | 53.2 |
| 68 E | 417  | 3.0  | 0.22 | 27 | 100 | 0.0833 | 2.5 | 0.1634 | 2.2 | 6.12  | 1.876  | 3.3 | 0.66 | 1276 | 97  | 975  | 39 | 1073 | 44 | 23.5 |
| 68 D | 236  | 3.9  | 0.27 | 31 | 115 | 0.0768 | 1.4 | 0.1776 | 1.3 | 5.63  | 1.880  | 1.9 | 0.66 | 1115 | 57  | 1054 | 24 | 1074 | 25 | 5.5  |
| 68 C | 54   | 2.1  | 0.14 | 17 | 64  | 0.0770 | 1.4 | 0.1778 | 1.4 | 5.63  | 1.886  | 2.0 | 0.70 | 1120 | 57  | 1055 | 27 | 1076 | 27 | 5.8  |
| 68 L | 226  | 9.3  | 0.74 | 61 | 223 | 0.0912 | 1.4 | 0.2232 | 2.4 | 4.48  | 2.807  | 2.8 | 0.86 | 1451 | 55  | 1299 | 57 | 1357 | 43 | 10.5 |
| 68 K | 344  | 3.9  | 0.38 | 19 | 68  | 0.1120 | 1.5 | 0.3133 | 1.5 | 3.19  | 4.839  | 2.1 | 0.70 | 1832 | 55  | 1757 | 47 | 1792 | 37 | 4.1  |
| 68 J | 131  | 1.6  | 0.13 | 21 | 76  | 0.0926 | 2.1 | 0.1129 | 3.6 | 8.86  | 1.441  | 4.1 | 0.87 | 1479 | 78  | 690  | 47 | 906  | 51 | 53.4 |
| 68 I | 293  | 3.4  | 0.24 | 36 | 131 | 0.0758 | 1.5 | 0.1465 | 2.5 | 6.82  | 1.531  | 2.9 | 0.86 | 1089 | 61  | 881  | 42 | 943  | 37 | 19.0 |

|       |      |      |      |     |     |        |     |        |     |       |        |     |      |      |     |      |     |      |     |      |
|-------|------|------|------|-----|-----|--------|-----|--------|-----|-------|--------|-----|------|------|-----|------|-----|------|-----|------|
| 68 H  | 709  | 8.9  | 0.72 | 85  | 314 | 0.0916 | 1.8 | 0.1526 | 2.7 | 6.55  | 1.929  | 3.2 | 0.83 | 1460 | 67  | 916  | 46  | 1091 | 44  | 37.3 |
| 68 G  | 141  | 5.6  | 0.38 | 47  | 173 | 0.0757 | 1.4 | 0.1694 | 1.3 | 5.90  | 1.768  | 1.9 | 0.68 | 1088 | 57  | 1009 | 24  | 1034 | 25  | 7.3  |
| 68 Q  | 183  | 1.4  | 0.12 | 16  | 60  | 0.0951 | 4.9 | 0.1325 | 4.0 | 7.55  | 1.737  | 6.3 | 0.63 | 1530 | 186 | 802  | 60  | 1022 | 85  | 47.6 |
| 68 P  | 98   | 1.9  | 0.10 | 37  | 135 | 0.0571 | 1.7 | 0.0728 | 1.3 | 13.73 | 0.574  | 2.1 | 0.60 | 497  | 74  | 453  | 11  | 460  | 16  | 8.8  |
| 68 O  | -127 | 6.1  | 0.41 | 48  | 178 | 0.0764 | 1.5 | 0.1792 | 1.0 | 5.58  | 1.888  | 1.8 | 0.56 | 1107 | 59  | 1062 | 20  | 1077 | 24  | 4.0  |
| 68 N  | 69   | 1.1  | 0.06 | 21  | 78  | 0.0639 | 3.0 | 0.0742 | 1.1 | 13.48 | 0.654  | 3.2 | 0.33 | 739  | 127 | 461  | 9   | 511  | 26  | 37.6 |
| 68 N  | 198  | 0.9  | 0.07 | 8   | 30  | 0.0856 | 2.2 | 0.1642 | 1.1 | 6.09  | 1.938  | 2.5 | 0.43 | 1329 | 87  | 980  | 19  | 1094 | 34  | 26.3 |
| 68 X  | -181 | 7.1  | 0.46 | 60  | 220 | 0.0732 | 1.4 | 0.1788 | 1.5 | 5.59  | 1.806  | 2.0 | 0.72 | 1021 | 57  | 1060 | 28  | 1048 | 27  | -3.9 |
| 68 W  | 88   | 4.7  | 0.33 | 32  | 118 | 0.0802 | 1.4 | 0.2114 | 1.3 | 4.73  | 2.337  | 1.9 | 0.68 | 1201 | 55  | 1236 | 29  | 1223 | 28  | -2.9 |
| 68 U  | 96   | 2.6  | 0.20 | 18  | 66  | 0.0878 | 1.4 | 0.2117 | 1.2 | 4.72  | 2.564  | 1.9 | 0.65 | 1379 | 54  | 1238 | 27  | 1290 | 28  | 10.2 |
| 68 T  | -204 | 4.3  | 0.34 | 26  | 95  | 0.0905 | 1.4 | 0.2385 | 1.6 | 4.19  | 2.974  | 2.2 | 0.75 | 1435 | 55  | 1379 | 41  | 1401 | 34  | 3.9  |
| 68 S  | -336 | 5.9  | 0.39 | 49  | 179 | 0.0752 | 1.4 | 0.1762 | 0.9 | 5.68  | 1.826  | 1.7 | 0.55 | 1073 | 56  | 1046 | 18  | 1055 | 22  | 2.5  |
| 68 Di | 93   | 0.7  | 0.05 | 4   | 14  | 0.0844 | 1.6 | 0.2441 | 2.8 | 4.10  | 2.842  | 3.2 | 0.87 | 1303 | 61  | 1408 | 71  | 1367 | 49  | -8.1 |
| 68 Ci | 107  | 2.3  | 0.15 | 20  | 75  | 0.0736 | 1.5 | 0.1681 | 1.3 | 5.95  | 1.707  | 2.0 | 0.66 | 1031 | 60  | 1002 | 24  | 1011 | 26  | 2.9  |
| 68 Bi | 148  | 14.0 | 2.30 | 39  | 143 | 0.1848 | 1.4 | 0.5200 | 1.1 | 1.92  | 13.247 | 1.8 | 0.61 | 2696 | 46  | 2699 | 48  | 2697 | 34  | -0.1 |
| 68 Ai | 270  | 6.5  | 0.48 | 44  | 161 | 0.0828 | 1.4 | 0.2075 | 1.8 | 4.82  | 2.369  | 2.3 | 0.79 | 1265 | 55  | 1215 | 40  | 1233 | 33  | 3.9  |
| 68 Z  | 87   | 6.8  | 0.48 | 50  | 183 | 0.0802 | 1.4 | 0.1972 | 1.4 | 5.07  | 2.182  | 2.0 | 0.69 | 1203 | 57  | 1160 | 29  | 1175 | 28  | 3.5  |
| 68 Y  | 151  | 6.0  | 0.46 | 39  | 143 | 0.0874 | 1.6 | 0.2276 | 2.0 | 4.39  | 2.744  | 2.5 | 0.79 | 1370 | 60  | 1322 | 48  | 1340 | 39  | 3.5  |
| 68 Ji | 99   | 14.5 | 0.99 | 108 | 396 | 0.0772 | 1.4 | 0.2001 | 0.9 | 5.00  | 2.129  | 1.7 | 0.54 | 1126 | 56  | 1176 | 19  | 1158 | 23  | -4.5 |
| 68 li | -51  | 0.6  | 0.04 | 5   | 18  | 0.0758 | 2.9 | 0.1793 | 1.0 | 5.58  | 1.874  | 3.1 | 0.34 | 1090 | 115 | 1063 | 21  | 1072 | 41  | 2.5  |
| 68 Hi | 257  | 6.7  | 1.01 | 29  | 105 | 0.1705 | 1.5 | 0.3718 | 6.2 | 2.69  | 8.741  | 6.4 | 0.97 | 2563 | 50  | 2038 | 221 | 2311 | 124 | 20.5 |
| 68 Ei | 77   | 1.3  | 0.08 | 11  | 39  | 0.0730 | 1.5 | 0.1766 | 0.7 | 5.66  | 1.778  | 1.6 | 0.42 | 1014 | 59  | 1048 | 13  | 1037 | 21  | -3.4 |
| 68 Oi | 173  | 2.9  | 0.21 | 30  | 110 | 0.0878 | 2.9 | 0.1488 | 2.9 | 6.72  | 1.802  | 4.1 | 0.71 | 1379 | 110 | 894  | 48  | 1046 | 54  | 35.1 |
| 68 Ni | 5    | 1.5  | 0.09 | 28  | 102 | 0.0667 | 3.9 | 0.0824 | 2.5 | 12.13 | 0.758  | 4.6 | 0.54 | 829  | 161 | 511  | 24  | 573  | 41  | 38.4 |
| 68 Mi | 15   | 6.9  | 0.50 | 53  | 197 | 0.0828 | 1.7 | 0.1856 | 2.0 | 5.39  | 2.119  | 2.6 | 0.75 | 1265 | 67  | 1097 | 40  | 1155 | 37  | 13.3 |
| 68 Li | 178  | 2.0  | 0.15 | 15  | 55  | 0.0854 | 1.6 | 0.2018 | 2.0 | 4.96  | 2.376  | 2.6 | 0.77 | 1324 | 64  | 1185 | 43  | 1235 | 37  | 10.5 |
| 68 Ki | 199  | 1.2  | 0.08 | 10  | 35  | 0.0784 | 1.6 | 0.1806 | 2.2 | 5.54  | 1.954  | 2.7 | 0.82 | 1158 | 62  | 1071 | 44  | 1100 | 37  | 7.6  |
| 68 Ti | -6   | 2.3  | 0.15 | 18  | 67  | 0.0761 | 1.4 | 0.1778 | 1.8 | 5.62  | 1.865  | 2.3 | 0.79 | 1097 | 57  | 1055 | 36  | 1069 | 31  | 3.8  |
| 68 Si | 25   | 2.5  | 0.13 | 49  | 182 | 0.0597 | 1.8 | 0.0761 | 1.9 | 13.14 | 0.627  | 2.7 | 0.72 | 593  | 80  | 473  | 18  | 494  | 21  | 20.3 |
| 68 Gi | 15   | 15.7 | 2.48 | 46  | 287 | 0.1762 | 0.2 | 0.5007 | 0.8 | 2.00  | 12.163 | 0.8 | 0.97 | 2617 | 7   | 2617 | 34  | 2617 | 15  | 0.0  |
| 68 Qi | 389  | 5.7  | 0.40 | 51  | 319 | 0.0783 | 0.6 | 0.1663 | 1.7 | 6.01  | 1.796  | 1.8 | 0.95 | 1155 | 23  | 992  | 32  | 1044 | 24  | 14.1 |

**Sample N5071**

|       |     |      |      |     |     |        |     |        |     |       |        |     |      |      |     |      |     |      |    |      |
|-------|-----|------|------|-----|-----|--------|-----|--------|-----|-------|--------|-----|------|------|-----|------|-----|------|----|------|
| 71-a  | 252 | 3.3  | 0.27 | 22  | 111 | 0.0880 | 1.8 | 0.2344 | 2.6 | 4.27  | 2.846  | 3.1 | 0.82 | 1383 | 69  | 1358 | 63  | 1368 | 48 | 1.8  |
| 71-b  | 171 | 2.7  | 0.53 | 8   | 41  | 0.2026 | 1.8 | 0.5364 | 2.2 | 1.86  | 14.985 | 2.9 | 0.78 | 2847 | 58  | 2769 | 102 | 2814 | 56 | 2.8  |
| 71-c  | 144 | 0.6  | 0.03 | 12  | 60  | 0.0568 | 2.1 | 0.0759 | 2.6 | 13.18 | 0.594  | 3.4 | 0.78 | 482  | 93  | 472  | 24  | 473  | 26 | 2.1  |
| 71-d  | 148 | 4.4  | 0.31 | 39  | 197 | 0.0761 | 1.8 | 0.1818 | 2.5 | 5.50  | 1.907  | 3.1 | 0.81 | 1097 | 71  | 1077 | 50  | 1084 | 42 | 1.8  |
| 71-f  | 28  | 6.7  | 0.60 | 43  | 216 | 0.0944 | 1.9 | 0.2512 | 2.5 | 3.98  | 3.271  | 3.1 | 0.80 | 1517 | 70  | 1445 | 65  | 1474 | 50 | 4.7  |
| 71-g  | 46  | 3.8  | 0.30 | 33  | 168 | 0.0844 | 3.4 | 0.1906 | 4.4 | 5.25  | 2.218  | 5.5 | 0.80 | 1302 | 130 | 1125 | 92  | 1187 | 81 | 13.6 |
| 71-i  | 256 | 6.1  | 0.50 | 48  | 243 | 0.0858 | 2.0 | 0.2027 | 2.6 | 4.93  | 2.397  | 3.3 | 0.79 | 1333 | 77  | 1190 | 56  | 1242 | 48 | 10.7 |
| 71-j  | 69  | 1.9  | 0.14 | 18  | 91  | 0.0774 | 1.9 | 0.1655 | 3.5 | 6.04  | 1.766  | 4.0 | 0.88 | 1131 | 77  | 987  | 65  | 1033 | 54 | 12.7 |
| 71-k  | -13 | 2.2  | 0.19 | 16  | 82  | 0.0911 | 2.1 | 0.2205 | 3.0 | 4.53  | 2.770  | 3.7 | 0.82 | 1449 | 82  | 1285 | 71  | 1348 | 57 | 11.3 |
| 71-p  | -28 | 6.2  | 0.55 | 39  | 195 | 0.0945 | 1.8 | 0.2632 | 2.5 | 3.80  | 3.430  | 3.1 | 0.80 | 1519 | 70  | 1506 | 67  | 1511 | 50 | 0.8  |
| 71-s  | 55  | 4.3  | 0.36 | 32  | 162 | 0.0862 | 1.9 | 0.2170 | 2.3 | 4.61  | 2.580  | 3.0 | 0.76 | 1343 | 74  | 1266 | 52  | 1295 | 44 | 5.8  |
| 71-t  | 319 | 4.3  | 0.35 | 36  | 183 | 0.0870 | 3.4 | 0.1930 | 2.6 | 5.18  | 2.316  | 4.3 | 0.61 | 1361 | 130 | 1138 | 55  | 1217 | 62 | 16.4 |
| 71-u  | 27  | 1.2  | 0.10 | 11  | 56  | 0.0852 | 3.4 | 0.1744 | 2.6 | 5.73  | 2.050  | 4.3 | 0.61 | 1321 | 133 | 1037 | 51  | 1132 | 61 | 21.5 |
| 71-v  | 32  | 1.7  | 0.10 | 37  | 189 | 0.0646 | 3.4 | 0.0740 | 2.7 | 13.51 | 0.659  | 4.4 | 0.61 | 760  | 145 | 460  | 24  | 514  | 36 | 39.4 |
| 71-w  | 74  | 2.7  | 0.16 | 59  | 296 | 0.0593 | 2.1 | 0.0775 | 2.2 | 12.90 | 0.634  | 3.0 | 0.74 | 578  | 89  | 481  | 21  | 498  | 24 | 16.8 |
| 71-x  | -43 | 1.3  | 0.11 | 12  | 58  | 0.0844 | 2.3 | 0.1904 | 2.9 | 5.25  | 2.215  | 3.7 | 0.78 | 1302 | 88  | 1123 | 59  | 1186 | 53 | 13.7 |
| 71-y  | -6  | 6.4  | 0.63 | 37  | 187 | 0.1022 | 1.8 | 0.2845 | 2.3 | 3.52  | 4.009  | 3.0 | 0.79 | 1665 | 67  | 1614 | 67  | 1636 | 49 | 3.1  |
| 71-Ai | 256 | 1.8  | 0.14 | 20  | 98  | 0.0770 | 2.5 | 0.1553 | 2.8 | 6.44  | 1.648  | 3.7 | 0.75 | 1121 | 98  | 931  | 49  | 989  | 48 | 17.0 |
| 71-Bi | 164 | 0.6  | 0.05 | 6   | 29  | 0.0822 | 2.2 | 0.1873 | 3.2 | 5.34  | 2.122  | 3.9 | 0.82 | 1249 | 87  | 1107 | 65  | 1156 | 55 | 11.4 |
| 71-Ci | -46 | 2.8  | 0.21 | 25  | 124 | 0.0790 | 1.8 | 0.2042 | 2.6 | 4.90  | 2.226  | 3.2 | 0.81 | 1173 | 73  | 1198 | 57  | 1189 | 45 | -2.1 |
| 71-Di | 142 | 6.4  | 0.57 | 40  | 200 | 0.0925 | 1.8 | 0.2647 | 2.2 | 3.78  | 3.376  | 2.9 | 0.78 | 1477 | 68  | 1514 | 61  | 1499 | 46 | -2.5 |
| 71-Ei | 318 | 16.0 | 1.41 | 115 | 577 | 0.0937 | 4.0 | 0.2269 | 3.8 | 4.41  | 2.930  | 5.5 | 0.68 | 1501 | 153 | 1318 | 91  | 1390 | 88 | 12.2 |

|       |      |      |      |     |     |        |     |        |     |       |        |     |      |      |     |      |     |      |    |       |
|-------|------|------|------|-----|-----|--------|-----|--------|-----|-------|--------|-----|------|------|-----|------|-----|------|----|-------|
| 71-Fi | 105  | 2.7  | 0.21 | 23  | 115 | 0.0787 | 2.0 | 0.1956 | 2.4 | 5.11  | 2.124  | 3.1 | 0.78 | 1166 | 77  | 1152 | 51  | 1157 | 44 | 1.2   |
| 71-m  | 281  | 3.5  | 0.27 | 32  | 159 | 0.0802 | 1.7 | 0.1777 | 2.0 | 5.63  | 1.965  | 2.7 | 0.77 | 1202 | 67  | 1055 | 40  | 1104 | 36 | 12.2  |
| 71-n  | -15  | 3.1  | 0.25 | 24  | 119 | 0.0870 | 1.5 | 0.2147 | 2.4 | 4.66  | 2.575  | 2.9 | 0.85 | 1360 | 59  | 1254 | 55  | 1294 | 43 | 7.8   |
| 71-o  | 194  | 2.1  | 0.19 | 18  | 88  | 0.0915 | 2.9 | 0.1983 | 2.4 | 5.04  | 2.501  | 3.8 | 0.64 | 1457 | 111 | 1166 | 51  | 1272 | 56 | 19.9  |
| 71-Fi | 105  | 2.7  | 0.21 | 23  | 114 | 0.0794 | 1.7 | 0.1963 | 2.4 | 5.10  | 2.148  | 2.9 | 0.82 | 1181 | 67  | 1155 | 51  | 1164 | 41 | 2.2   |
| 71-Gi | -72  | 1.4  | 0.11 | 12  | 60  | 0.0807 | 1.7 | 0.2058 | 2.5 | 4.86  | 2.289  | 3.0 | 0.83 | 1213 | 66  | 1206 | 54  | 1209 | 43 | 0.6   |
| 71-Hi | 194  | 7.0  | 0.49 | 64  | 321 | 0.0736 | 1.5 | 0.1827 | 2.1 | 5.47  | 1.855  | 2.6 | 0.82 | 1032 | 61  | 1082 | 42  | 1065 | 35 | -4.9  |
| 71-Ii | 93   | 1.2  | 0.10 | 9   | 47  | 0.0872 | 2.0 | 0.2144 | 2.9 | 4.66  | 2.578  | 3.5 | 0.82 | 1365 | 78  | 1252 | 66  | 1295 | 53 | 8.3   |
| 71-Ji | 157  | 5.6  | 0.39 | 51  | 254 | 0.0744 | 1.5 | 0.1840 | 2.2 | 5.43  | 1.888  | 2.7 | 0.82 | 1052 | 61  | 1089 | 44  | 1077 | 36 | -3.5  |
| 71-Li | 92   | 1.4  | 0.10 | 13  | 67  | 0.0794 | 1.8 | 0.1710 | 2.5 | 5.85  | 1.873  | 3.1 | 0.81 | 1183 | 71  | 1018 | 47  | 1072 | 41 | 14.0  |
| 71-Mi | 88   | 4.9  | 0.28 | 106 | 530 | 0.0584 | 1.6 | 0.0794 | 2.8 | 12.59 | 0.640  | 3.3 | 0.87 | 546  | 71  | 493  | 27  | 502  | 26 | 9.7   |
| 71-Ni | 178  | 2.9  | 0.16 | 61  | 305 | 0.0590 | 1.7 | 0.0782 | 2.3 | 12.79 | 0.636  | 2.8 | 0.81 | 568  | 72  | 485  | 21  | 500  | 22 | 14.5  |
| 71-Oi | 279  | 3.0  | 0.22 | 28  | 141 | 0.0797 | 2.0 | 0.1798 | 5.9 | 5.56  | 1.977  | 6.2 | 0.95 | 1190 | 80  | 1066 | 117 | 1108 | 88 | 10.4  |
| 71-h  | 279  | 8.9  | 1.44 | 61  | 445 | 0.1731 | 0.9 | 0.2427 | 2.3 | 4.12  | 5.793  | 2.4 | 0.93 | 2588 | 29  | 1401 | 58  | 1945 | 43 | 45.9  |
| 71-Pi | 171  | 22.6 | 0.92 | 314 | 705 | 0.0565 | 1.3 | 0.0791 | 0.7 | 12.64 | 0.616  | 1.4 | 0.47 | 474  | 55  | 491  | 6   | 488  | 11 | -3.6  |
| 71-Qi | 158  | 5.6  | 0.70 | 12  | 27  | 0.1735 | 1.3 | 0.5075 | 0.7 | 1.97  | 12.137 | 1.4 | 0.46 | 2591 | 42  | 2646 | 29  | 2615 | 27 | -2.1  |
| 71-Si | 229  | 3.4  | 0.15 | 46  | 103 | 0.0597 | 1.5 | 0.0829 | 0.8 | 12.06 | 0.683  | 1.7 | 0.49 | 594  | 62  | 513  | 8   | 529  | 14 | 13.6  |
| Ui    | 513  | 10.9 | 0.72 | 39  | 85  | 0.0923 | 1.0 | 0.2701 | 0.7 | 3.70  | 3.439  | 1.2 | 0.57 | 1474 | 37  | 1541 | 18  | 1513 | 19 | -4.5  |
| Vi    | 227  | 16.7 | 0.83 | 94  | 205 | 0.0704 | 1.0 | 0.1686 | 0.6 | 5.93  | 1.637  | 1.2 | 0.55 | 941  | 40  | 1004 | 12  | 985  | 15 | -6.7  |
| Wi    | 664  | 28.9 | 1.84 | 103 | 226 | 0.0888 | 1.0 | 0.2691 | 0.7 | 3.72  | 3.295  | 1.2 | 0.59 | 1400 | 37  | 1536 | 19  | 1480 | 19 | -9.7  |
| Xi    | 666  | 18.2 | 1.29 | 59  | 129 | 0.0989 | 1.0 | 0.2956 | 0.7 | 3.38  | 4.030  | 1.2 | 0.57 | 1603 | 37  | 1669 | 20  | 1640 | 20 | -4.1  |
| Zi    | 224  | 15.1 | 0.77 | 83  | 182 | 0.0712 | 1.0 | 0.1756 | 0.7 | 5.69  | 1.723  | 1.2 | 0.60 | 962  | 40  | 1043 | 14  | 1017 | 16 | -8.4  |
| Aii   | 454  | 4.6  | 0.19 | 58  | 126 | 0.0574 | 1.1 | 0.0790 | 0.8 | 12.65 | 0.625  | 1.3 | 0.58 | 505  | 47  | 490  | 7   | 493  | 10 | 3.0   |
| Bii   | 550  | 4.5  | 0.24 | 23  | 51  | 0.0754 | 1.0 | 0.1884 | 0.9 | 5.31  | 1.958  | 1.3 | 0.69 | 1078 | 39  | 1113 | 19  | 1101 | 18 | -3.2  |
| Cii   | 426  | 6.5  | 0.29 | 79  | 172 | 0.0635 | 2.8 | 0.0804 | 1.1 | 12.44 | 0.704  | 3.0 | 0.36 | 726  | 121 | 499  | 11  | 541  | 26 | 31.4  |
| Dii   | 299  | 6.4  | 0.26 | 79  | 172 | 0.0567 | 1.0 | 0.0789 | 0.8 | 12.67 | 0.617  | 1.3 | 0.64 | 480  | 44  | 490  | 8   | 488  | 10 | -2.0  |
| Eii   | 228  | 4.6  | 0.27 | 22  | 48  | 0.0793 | 1.0 | 0.2063 | 0.9 | 4.85  | 2.254  | 1.4 | 0.66 | 1179 | 41  | 1209 | 20  | 1198 | 20 | -2.5  |
| Fii   | 197  | 6.3  | 0.32 | 38  | 82  | 0.0719 | 1.3 | 0.1606 | 0.9 | 6.23  | 1.593  | 1.6 | 0.58 | 983  | 53  | 960  | 16  | 967  | 20 | 2.4   |
| Gii   | 221  | 16.7 | 1.10 | 60  | 132 | 0.0926 | 1.0 | 0.2689 | 0.8 | 3.72  | 3.433  | 1.3 | 0.65 | 1479 | 37  | 1535 | 23  | 1512 | 20 | -3.8  |
| Hii   | -100 | 1.5  | 0.08 | 9   | 20  | 0.0737 | 1.1 | 0.1623 | 0.9 | 6.16  | 1.650  | 1.4 | 0.63 | 1033 | 44  | 970  | 16  | 989  | 18 | 6.1   |
| Iii   | 174  | 4.4  | 0.26 | 21  | 47  | 0.0814 | 1.1 | 0.1999 | 0.8 | 5.00  | 2.243  | 1.4 | 0.57 | 1231 | 45  | 1175 | 17  | 1195 | 20 | 4.6   |
| Kii   | 6    | 12.3 | 0.67 | 59  | 129 | 0.0772 | 1.0 | 0.2003 | 0.9 | 4.99  | 2.133  | 1.3 | 0.68 | 1127 | 39  | 1177 | 19  | 1160 | 18 | -4.5  |
| Lii   | 336  | 19.8 | 1.43 | 62  | 136 | 0.1002 | 1.0 | 0.3167 | 1.9 | 3.16  | 4.375  | 2.1 | 0.89 | 1628 | 37  | 1774 | 58  | 1708 | 35 | -9.0  |
| Mii   | 563  | 7.4  | 0.41 | 36  | 79  | 0.0796 | 1.0 | 0.2006 | 0.9 | 4.99  | 2.203  | 1.3 | 0.69 | 1188 | 38  | 1179 | 20  | 1182 | 19 | 0.8   |
| Nii   | 145  | 3.7  | 0.14 | 49  | 107 | 0.0571 | 1.0 | 0.0734 | 0.8 | 13.63 | 0.578  | 1.3 | 0.61 | 496  | 44  | 456  | 7   | 463  | 9  | 8.0   |
| Oii   | 190  | 5.4  | 0.29 | 29  | 63  | 0.0767 | 1.0 | 0.1870 | 0.8 | 5.35  | 1.978  | 1.3 | 0.63 | 1113 | 39  | 1105 | 16  | 1108 | 17 | 0.7   |
| Pii   | -1   | 22.1 | 1.70 | 64  | 139 | 0.1112 | 1.0 | 0.3392 | 0.8 | 2.95  | 5.200  | 1.3 | 0.64 | 1819 | 35  | 1883 | 26  | 1853 | 22 | -3.5  |
| Qii   | 387  | 12.4 | 0.67 | 59  | 130 | 0.0782 | 1.0 | 0.2053 | 0.8 | 4.87  | 2.214  | 1.2 | 0.63 | 1152 | 39  | 1204 | 17  | 1186 | 18 | -4.5  |
| Rii   | 133  | 10.6 | 1.36 | 19  | 43  | 0.1845 | 1.0 | 0.5321 | 0.8 | 1.88  | 13.538 | 1.2 | 0.63 | 2694 | 32  | 2750 | 36  | 2718 | 24 | -2.1  |
| Uii   | 226  | 1.9  | 0.09 | 8   | 17  | 0.0739 | 1.1 | 0.2327 | 0.7 | 4.30  | 2.372  | 1.3 | 0.52 | 1040 | 45  | 1349 | 16  | 1234 | 19 | -29.7 |
| Vii   | 430  | 6.7  | 0.38 | 35  | 77  | 0.0795 | 1.8 | 0.1894 | 0.7 | 5.28  | 2.076  | 1.9 | 0.37 | 1185 | 71  | 1118 | 15  | 1141 | 27 | 5.6   |
| Wii   | 236  | 8.0  | 0.42 | 41  | 90  | 0.0750 | 1.0 | 0.1903 | 0.7 | 5.25  | 1.969  | 1.2 | 0.60 | 1070 | 39  | 1123 | 15  | 1105 | 16 | -5.0  |
| Yii   | 129  | 14.2 | 1.01 | 47  | 102 | 0.1023 | 1.0 | 0.3027 | 0.7 | 3.30  | 4.269  | 1.2 | 0.59 | 1666 | 36  | 1705 | 21  | 1687 | 20 | -2.3  |
| Aiii  | 164  | 7.7  | 1.06 | 13  | 29  | 0.1976 | 1.0 | 0.5722 | 0.7 | 1.75  | 15.588 | 1.2 | 0.61 | 2806 | 32  | 2917 | 35  | 2852 | 23 | -3.9  |
| Biii  | -100 | 0.4  | 0.02 | 3   | 7   | 0.0597 | 2.1 | 0.1144 | 0.7 | 8.74  | 0.942  | 2.2 | 0.34 | 593  | 90  | 698  | 10  | 674  | 22 | -17.8 |
| Ciii  | -137 | 2.0  | 0.11 | 10  | 22  | 0.0773 | 1.0 | 0.1933 | 0.8 | 5.17  | 2.059  | 1.3 | 0.62 | 1128 | 39  | 1139 | 16  | 1135 | 17 | -1.0  |
| 71-Ti | 262  | 22.2 | 2.97 | 48  | 196 | 0.1863 | 0.3 | 0.5288 | 0.8 | 1.89  | 13.587 | 0.9 | 0.93 | 2710 | 10  | 2737 | 36  | 2721 | 17 | -1.0  |
| Sii   | 397  | 23.6 | 1.19 | 132 | 467 | 0.0716 | 0.3 | 0.1782 | 0.7 | 5.61  | 1.760  | 0.8 | 0.90 | 975  | 14  | 1057 | 14  | 1031 | 10 | -8.5  |
| Tii   | 56   | 22.3 | 2.90 | 41  | 144 | 0.1836 | 0.3 | 0.5534 | 0.7 | 1.81  | 14.007 | 0.8 | 0.90 | 2685 | 11  | 2839 | 31  | 2750 | 14 | -5.7  |
| Xii   | 149  | 21.3 | 1.38 | 78  | 275 | 0.0916 | 0.3 | 0.2767 | 0.7 | 3.61  | 3.495  | 0.7 | 0.90 | 1460 | 12  | 1575 | 19  | 1526 | 12 | -7.9  |
| Zii   | 41   | 19.1 | 0.93 | 117 | 413 | 0.0692 | 0.3 | 0.1649 | 0.7 | 6.06  | 1.573  | 0.7 | 0.90 | 903  | 13  | 984  | 12  | 959  | 9  | -9.0  |

**Sample N5075**

|      |     |     |      |    |     |        |     |        |     |      |      |     |      |      |     |      |    |      |    |      |
|------|-----|-----|------|----|-----|--------|-----|--------|-----|------|------|-----|------|------|-----|------|----|------|----|------|
| 75-a | 210 | 3.4 | 0.23 | 23 | 129 | 0.0725 | 5.0 | 0.1703 | 1.9 | 5.87 | 1.70 | 5.4 | 0.35 | 1000 | 204 | 1014 | 35 | 1010 | 71 | -1.3 |
| 75-b | 68  | 6.5 | 0.44 | 44 | 249 | 0.0721 | 4.9 | 0.1805 | 1.6 | 5.54 | 1.80 | 5.2 | 0.31 | 990  | 201 | 1070 | 32 | 1044 | 70 | -8.1 |
| 75-d | 172 | 3.3 | 0.24 | 23 | 130 | 0.0726 | 5.2 | 0.1803 | 1.9 | 5.55 | 1.81 | 5.6 | 0.34 | 1004 | 213 | 1068 | 37 | 1047 | 76 | -6.4 |

|       |      |      |      |    |     |        |     |        |     |       |       |     |      |      |     |      |    |      |    |       |
|-------|------|------|------|----|-----|--------|-----|--------|-----|-------|-------|-----|------|------|-----|------|----|------|----|-------|
| 75-f  | 40   | 1.8  | 0.12 | 13 | 75  | 0.0683 | 5.0 | 0.1713 | 1.6 | 5.84  | 1.61  | 5.3 | 0.30 | 879  | 209 | 1019 | 30 | 976  | 68 | -16.0 |
| 75 G  | -77  | 2.5  | 0.18 | 18 | 88  | 0.0791 | 1.3 | 0.2009 | 1.0 | 4.98  | 2.19  | 1.6 | 0.60 | 1175 | 52  | 1180 | 21 | 1178 | 23 | -0.4  |
| 75 H  | -62  | 3.8  | 0.27 | 31 | 149 | 0.0810 | 1.4 | 0.1938 | 2.5 | 5.16  | 2.16  | 2.8 | 0.87 | 1221 | 54  | 1142 | 52 | 1170 | 40 | 6.5   |
| 75 I  | 54   | 3.2  | 0.22 | 27 | 128 | 0.0757 | 1.3 | 0.1802 | 1.2 | 5.55  | 1.88  | 1.8 | 0.69 | 1088 | 52  | 1068 | 24 | 1075 | 24 | 1.8   |
| 75 J  | -317 | 0.5  | 0.04 | 4  | 17  | 0.0870 | 2.2 | 0.2157 | 1.2 | 4.64  | 2.59  | 2.6 | 0.48 | 1360 | 86  | 1259 | 28 | 1297 | 38 | 7.4   |
| 75 K  | -153 | 7.3  | 1.21 | 26 | 127 | 0.1872 | 1.3 | 0.4119 | 1.3 | 2.43  | 10.63 | 1.9 | 0.72 | 2718 | 43  | 2224 | 51 | 2492 | 35 | 18.2  |
| 75 L  | -180 | 9.4  | 0.96 | 42 | 204 | 0.1156 | 1.3 | 0.3313 | 1.0 | 3.02  | 5.28  | 1.7 | 0.63 | 1889 | 46  | 1845 | 34 | 1866 | 29 | 2.3   |
| 75 M  | -227 | 0.9  | 0.06 | 9  | 43  | 0.0781 | 1.7 | 0.1657 | 2.8 | 6.04  | 1.78  | 3.3 | 0.85 | 1148 | 68  | 988  | 51 | 1039 | 44 | 13.9  |
| 75 N  | -77  | 3.0  | 0.21 | 23 | 109 | 0.0813 | 1.8 | 0.1833 | 1.6 | 5.46  | 2.05  | 2.4 | 0.67 | 1229 | 70  | 1085 | 32 | 1134 | 33 | 11.7  |
| 75 O  | -32  | 2.0  | 0.15 | 12 | 59  | 0.0874 | 1.3 | 0.2368 | 1.0 | 4.22  | 2.85  | 1.6 | 0.60 | 1369 | 50  | 1370 | 24 | 1370 | 25 | -0.1  |
| 75 P  | -473 | 0.7  | 0.04 | 14 | 69  | 0.0580 | 1.7 | 0.0764 | 1.6 | 13.09 | 0.61  | 2.3 | 0.68 | 530  | 74  | 475  | 14 | 484  | 18 | 10.5  |
| 75 Q  | -95  | 1.8  | 0.13 | 14 | 66  | 0.0827 | 1.5 | 0.1963 | 3.3 | 5.09  | 2.24  | 3.6 | 0.91 | 1262 | 59  | 1156 | 71 | 1193 | 52 | 8.4   |
| 75 R  | -63  | 7.8  | 1.15 | 46 | 223 | 0.1632 | 1.9 | 0.2359 | 3.3 | 4.24  | 5.31  | 3.8 | 0.87 | 2489 | 64  | 1366 | 82 | 1870 | 68 | 45.1  |
| 75 S  | 470  | 11.6 | 1.89 | 33 | 158 | 0.1841 | 1.3 | 0.4941 | 2.1 | 2.02  | 12.55 | 2.5 | 0.85 | 2691 | 43  | 2588 | 91 | 2646 | 48 | 3.8   |
| 75 U  | -111 | 3.5  | 0.38 | 17 | 83  | 0.1217 | 1.4 | 0.2830 | 2.3 | 3.53  | 4.75  | 2.7 | 0.85 | 1981 | 50  | 1606 | 65 | 1776 | 46 | 18.9  |
| 75 Ai | 28   | 1.5  | 0.12 | 11 | 51  | 0.0857 | 1.5 | 0.1955 | 2.8 | 5.12  | 2.31  | 3.2 | 0.88 | 1332 | 58  | 1151 | 59 | 1215 | 46 | 13.6  |
| 75 Bi | 43   | 3.9  | 0.28 | 30 | 146 | 0.0801 | 2.2 | 0.1809 | 1.0 | 5.53  | 2.00  | 2.4 | 0.40 | 1200 | 85  | 1072 | 19 | 1115 | 33 | 10.7  |
| 75 Ci | -106 | 0.7  | 0.04 | 13 | 63  | 0.0607 | 2.2 | 0.0759 | 0.8 | 13.17 | 0.64  | 2.3 | 0.33 | 629  | 96  | 472  | 7  | 500  | 19 | 25.0  |
| 75 Di | -235 | 0.8  | 0.05 | 12 | 59  | 0.0592 | 2.7 | 0.0761 | 2.8 | 13.14 | 0.62  | 3.9 | 0.72 | 575  | 117 | 473  | 26 | 491  | 31 | 17.8  |
| 75 Fi | -149 | 1.1  | 0.08 | 8  | 38  | 0.0801 | 1.4 | 0.1882 | 4.1 | 5.31  | 2.08  | 4.3 | 0.95 | 1199 | 54  | 1112 | 84 | 1142 | 61 | 7.3   |
| 75 Gi | -28  | 2.8  | 0.19 | 23 | 112 | 0.0759 | 1.3 | 0.1725 | 1.3 | 5.80  | 1.81  | 1.8 | 0.69 | 1093 | 53  | 1026 | 24 | 1047 | 24 | 6.1   |
| 75 Hi | 40   | 4.0  | 0.32 | 24 | 115 | 0.0895 | 1.3 | 0.2381 | 1.7 | 4.20  | 2.94  | 2.1 | 0.79 | 1414 | 49  | 1377 | 42 | 1392 | 33 | 2.6   |
| 75 Ii | -41  | 6.9  | 0.53 | 44 | 212 | 0.0871 | 1.5 | 0.2233 | 2.6 | 4.48  | 2.68  | 3.0 | 0.87 | 1362 | 56  | 1300 | 61 | 1323 | 45 | 4.6   |
| 75 Ji | 185  | 1.4  | 0.09 | 12 | 57  | 0.0732 | 1.3 | 0.1703 | 2.0 | 5.87  | 1.72  | 2.4 | 0.84 | 1019 | 53  | 1014 | 38 | 1015 | 32 | 0.5   |
| 75 Ki | -118 | 3.2  | 0.21 | 25 | 122 | 0.0751 | 1.3 | 0.1772 | 1.7 | 5.64  | 1.84  | 2.1 | 0.79 | 1072 | 52  | 1052 | 33 | 1058 | 29 | 1.9   |
| 75 Li | -10  | 1.4  | 0.07 | 25 | 122 | 0.0556 | 1.3 | 0.0769 | 0.9 | 13.00 | 0.59  | 1.6 | 0.57 | 438  | 60  | 478  | 9  | 471  | 12 | -9.0  |
| 75 Mi | 49   | 1.8  | 0.11 | 15 | 71  | 0.0717 | 1.3 | 0.1703 | 1.2 | 5.87  | 1.68  | 1.8 | 0.68 | 979  | 54  | 1014 | 23 | 1003 | 23 | -3.6  |
| 75 Ni | 259  | 1.0  | 0.07 | 10 | 46  | 0.0733 | 1.5 | 0.1582 | 3.3 | 6.32  | 1.60  | 3.7 | 0.92 | 1021 | 59  | 947  | 59 | 969  | 47 | 7.3   |
| 75 Oi | 142  | 0.8  | 0.04 | 16 | 75  | 0.0566 | 1.7 | 0.0756 | 1.4 | 13.23 | 0.59  | 2.2 | 0.63 | 477  | 74  | 470  | 12 | 471  | 16 | 1.6   |
| 75 Pi | -89  | 3.6  | 0.28 | 22 | 106 | 0.0874 | 1.3 | 0.2322 | 1.6 | 4.31  | 2.80  | 2.0 | 0.77 | 1369 | 50  | 1346 | 38 | 1355 | 31 | 1.6   |
| 75 Qi | 261  | 0.8  | 0.04 | 15 | 71  | 0.0564 | 1.4 | 0.0761 | 1.3 | 13.15 | 0.59  | 1.9 | 0.66 | 467  | 64  | 473  | 11 | 472  | 15 | -1.1  |
| 75 Ri | -34  | 4.0  | 0.27 | 34 | 163 | 0.0732 | 1.3 | 0.1704 | 1.0 | 5.87  | 1.72  | 1.6 | 0.60 | 1019 | 53  | 1014 | 19 | 1016 | 21 | 0.5   |
| 75 Ti | 2    | 5.6  | 0.37 | 46 | 222 | 0.0732 | 1.3 | 0.1708 | 0.9 | 5.85  | 1.72  | 1.6 | 0.55 | 1019 | 53  | 1017 | 16 | 1017 | 20 | 0.3   |
| 75 Ui | 227  | 2.3  | 0.17 | 17 | 82  | 0.0809 | 1.6 | 0.1992 | 0.9 | 5.02  | 2.22  | 1.9 | 0.49 | 1220 | 64  | 1171 | 19 | 1188 | 26 | 4.0   |
| 75 Vi | -44  | 6.8  | 0.45 | 57 | 274 | 0.0735 | 1.3 | 0.1743 | 1.1 | 5.74  | 1.77  | 1.7 | 0.64 | 1029 | 53  | 1036 | 21 | 1034 | 23 | -0.7  |
| 75 Wi | -60  | 6.1  | 0.70 | 25 | 119 | 0.1268 | 1.5 | 0.3615 | 1.5 | 2.77  | 6.32  | 2.1 | 0.71 | 2054 | 52  | 1989 | 50 | 2021 | 37 | 3.2   |
| 75 Xi | -98  | 2.6  | 0.44 | 7  | 35  | 0.1881 | 1.3 | 0.5161 | 1.8 | 1.94  | 13.39 | 2.2 | 0.81 | 2726 | 43  | 2683 | 80 | 2707 | 43 | 1.6   |
| 75 Yi | 174  | 8.6  | 0.57 | 72 | 349 | 0.0732 | 1.3 | 0.1704 | 1.1 | 5.87  | 1.72  | 1.7 | 0.63 | 1018 | 54  | 1014 | 20 | 1016 | 22 | 0.4   |
| 75 V  | 121  | 3.5  | 0.25 | 30 | 172 | 0.0771 | 1.6 | 0.1624 | 4.0 | 6.16  | 1.73  | 4.3 | 0.93 | 1125 | 65  | 970  | 72 | 1019 | 57 | 13.7  |
| 75 W  | -62  | 0.8  | 0.04 | 16 | 89  | 0.0559 | 1.3 | 0.0755 | 1.1 | 13.25 | 0.58  | 1.7 | 0.66 | 447  | 57  | 469  | 10 | 465  | 13 | -4.9  |
| 75 X  | -189 | 2.5  | 0.18 | 18 | 103 | 0.0802 | 1.1 | 0.1943 | 0.8 | 5.15  | 2.15  | 1.4 | 0.60 | 1202 | 44  | 1145 | 17 | 1165 | 19 | 4.7   |
| 75 Y  | -97  | 2.2  | 0.16 | 15 | 87  | 0.0819 | 1.2 | 0.2003 | 1.4 | 4.99  | 2.26  | 1.8 | 0.77 | 1244 | 45  | 1177 | 30 | 1201 | 26 | 5.4   |
| 75 Z  | -39  | 1.1  | 0.06 | 22 | 123 | 0.0587 | 1.3 | 0.0759 | 0.8 | 13.17 | 0.61  | 1.5 | 0.55 | 557  | 55  | 472  | 7  | 487  | 12 | 15.3  |

<sup>a</sup>Accuracy of U content is ~20%

<sup>b</sup>All isotopic ratios are not common-Pb corrected

data in grey italics >10% discordant and/or outside of uncertainty of concordia and excluded from probability density plots
